1 **Intracellular *Salmonella* Paratyphi A is motile and differs in the expression of flagella-chemotaxis,**  
2 **SPI-1 and carbon utilization pathways in comparison to Intracellular *S. Typhimurium***

3 Helit Cohen<sup>1,†</sup>, Claire Hoede<sup>2,†</sup>, Felix Scharte<sup>3,†</sup>, Charles Coluzzi<sup>4</sup>, Emiliano Cohen<sup>1</sup>, Inna  
4 Shomer<sup>1</sup>, Ludovic Mallet<sup>2</sup>, Remy Felix Serre<sup>5</sup>, Thomas Schiex<sup>6</sup>, Isabelle Virlogeux-Payant<sup>7</sup>,  
5 Guntram Grassl<sup>8</sup>, Michael Hensel<sup>3,9§</sup>, H el ene Chiapello<sup>2,4,§</sup>, Ohad Gal-Mor<sup>1,10,§</sup>

6 <sup>1</sup> The Infectious Diseases Research Laboratory, Sheba Medical Center, Tel-Hashomer, Israel

7 <sup>2</sup> INRAE, UR875 Applied Mathematics and Computer Science Toulouse (MIAT), Platform  
8 GenoToul Bioinfo, F-31326 Castanet-Tolosan, France

9 <sup>3</sup> Abt. Mikrobiologie, Universit at Osnabr uck, Osnabr uck, Germany

10 <sup>4</sup> Universit e Paris-Saclay, INRAE, MaIAGE, 78350 Jouy-en-Josas, France

11 <sup>5</sup> INRAE, GeT-PlaGe, Genotoul, 31326 Castanet-Tolosan, France

12 <sup>6</sup> Universit e F ed erale de Toulouse, ANITI, INRAE, UR 875, Toulouse, France

13 <sup>7</sup> INRAE, Universit e de Tours, UMR ISP, F-37380, Nouzilly, France

14 <sup>8</sup> Institute of Medical Microbiology and Hospital Epidemiology, Hannover Medical School  
15 and German Center for Infection Research (DZIF), Hanover, Germany

16 <sup>9</sup> CellNanOs – Center of Cellular Nanoanalytics Osnabr uck, Universit at Osnabr uck,  
17 Osnabr uck, Germany

18 <sup>10</sup> Department of Clinical Microbiology and Immunology, Faculty of Medicine, Tel-Aviv  
19 University, Tel-Aviv, Israel

20 † Equal contribution

21 § Corresponding authors

25 **ABSTRACT**

26           Although *Salmonella* Typhimurium (STM) and *Salmonella* Paratyphi A (SPA) belong to the same  
27 phylogenetic species, share large portion of their genome and express many common virulence factors,  
28 they differ vastly in their host specificity, the immune response they elicit, and the clinical manifestations  
29 they cause. In this work, we compared for the first time their intracellular transcriptomic architecture and  
30 cellular phenotypes during epithelial cell infection. While transcription induction of many metal transport  
31 systems, purines, biotin, PhoPQ and SPI-2 regulons was common in both intracellular SPA and STM, we  
32 identified 234 differentially expressed genes that showed distinct expression patterns in intracellular SPA  
33 vs. STM. Surprisingly, clear expression differences were found in SPI-1, motility and chemotaxis, and  
34 carbon (mainly citrate, galactonate and ethanolamine) utilization pathways, indicating that these  
35 pathways are regulated and possibly function differently, during their intracellular phase. Moreover, we  
36 show that the induction of flagella genes by intracellular SPA leads to cytosolic motility, a conserved trait  
37 specific to SPA. To the best of our knowledge, this is the first report of a flagellum-dependent intracellular  
38 motility of any *Salmonella* serovar in living host cells. Importantly, we demonstrate that the elevated  
39 expression of SPI-1 and motility genes by intracellular SPA results in increased invasiveness of SPA,  
40 following exit from host cells. We propose that such changes prime SPA towards new cycles of host cell  
41 infection and contribute to the ability of SPA to disseminate beyond the intestinal lamina propria of the  
42 human host, during enteric fever.

44 **IMPORTANCE**

45 *Salmonella enterica* is a ubiquitous, facultative intracellular animal and human pathogen.  
46 Although non-typhoidal *Salmonella* (NTS) and typhoidal *Salmonella* serovars belong to the same  
47 phylogenetic species and share many virulence factors, the disease they cause in humans is very  
48 different. While the underlying mechanisms for these differences are not fully understood, one possible  
49 reason expected to contribute to their different pathogenicity is a distinct expression pattern of genes  
50 involved in host-pathogen interactions. Here, we compared the global gene expression and the  
51 intracellular behavior, during epithelial cell infection of *S. Paratyphi A* (SPA) and *S. Typhimurium* (STM),  
52 as prototypical serovars of typhoidal and NTS, respectively. Interestingly, we identified different  
53 expression patterns in key virulence and metabolic pathways, together with intracellular motility and  
54 increased invasiveness of SPA, following exit from infected cells. We hypothesize that these differences  
55 are pivotal to the invasive and systemic disease developed following SPA infection in humans.

56

## 57 INTRODUCTION

58 *Salmonella enterica* (*S. enterica*) is an abundant Gram-negative, facultative intracellular animal  
59 and human pathogen. This highly diverse bacterial species contains more than 2600 antigenically distinct  
60 serovars (biotypes) that are different in their host specificity and the disease they cause. The developed  
61 clinical manifestation is the result of multiple factors, but largely depends on the characteristics of the  
62 infecting serovar and the immunological status of the host (1). Many of the *S. enterica* serovars, including  
63 the ubiquitous *S. enterica* serovar Typhimurium (*S. Typhimurium*) are generalist pathogens and are  
64 capable of infecting a broad range of host species. Infection of immunocompetent humans by non-  
65 typhoidal *Salmonellae* (NTS) typically leads to a self-limiting, acute inflammatory gastroenteritis,  
66 confined to the terminal ileum and colon. In contrast, a few serovars including Typhi, Paratyphi A and  
67 Sendai, collectively referred to as ‘typhoidal salmonellae’ are restricted to the human host and known as  
68 the causative agents of enteric (typhoid) fever. In most cases, enteric fever is a non-inflammatory,  
69 systemic life-threatening disease, presented as bacteremia and dissemination of the pathogen to  
70 systemic sites such as the spleen, liver and lymph nodes (2-4).

71 *S. enterica* infections are still considered a significant cause of mortality and morbidity with an  
72 annual incidence of over 27 million cases of enteric fever (5), and 78.7 million cases of gastroenteritis (6)  
73 worldwide. In recent years, the global prevalence of *S. Paratyphi A* (SPA) is increasing and in some  
74 countries (especially in eastern and southern Asia), SPA infections are accountable for up to 50% of all  
75 enteric fever cases (7, 8). The lack of a commercial SPA vaccine and the increased occurrence of antibiotic  
76 resistant strains illuminate SPA as a significant public health concern that is still an understudied  
77 pathogen (9).

78 Active invasion into eukaryotic non-phagocytic cells is one of the key virulence-associated  
79 phenotypes of all *S. enterica* serovars. This unique capability facilitates *Salmonella* intestinal epithelium

80 crossing of the small intestine (10) and is mediated by a designated type three secretion system (T3SS)  
81 encoded in the *Salmonella* Pathogenicity Island (SPI)-1. This sophisticated syringe-like nanosystem is  
82 evolutionary related to the flagellar apparatus (11) and used to translocate an array of effector proteins  
83 directly into the host cell cytoplasm. Translocated effectors by T3SS-1 trigger cytoskeletal  
84 rearrangements and *Salmonella* penetration of intestinal barriers (12). In addition, T3SS-1 and its  
85 associated effectors significantly contribute to intestinal inflammation (13) that helps *Salmonella* to  
86 compete with the gut microbiota (14).

87 After penetrating the lamina propria into the submucosa and mesenteric lymph nodes,  
88 *Salmonella* are taken up by phagocytic cells such as macrophages and dendritic cells. Within host cells,  
89 *Salmonella* are compartmentalized into a modified intracellular phagosome, known as the *Salmonella*  
90 containing vacuole (SCV). Inside the SCV *Salmonella* manipulates the phagosome-lysosome membrane  
91 fusion and other cellular pathways, and starts to replicate intracellularly (13). These activities require a  
92 second T3SS encoded by genes on SPI-2 and the translocation of a distinct set of effectors proteins (15).

93 Typhoid fever disease and host-response to *S. Typhi* infection is largely attributed to the function  
94 of the Vi polysaccharide capsule and its associated regulator, TviA encoded on SPI-7 (16-19). Nonetheless,  
95 since SPA does not harbor the SPI-7, nor expresses the Vi capsule, different mechanisms are expected to  
96 contribute to the clinically indistinguishable enteric fever disease caused by SPA and *S. Typhi*. Previously,  
97 we showed that in *Salmonella* culture grown in LB to the late logarithmic phase, SPI-1 genes and T3SS-1  
98 effectors are expressed and secreted at significantly lower levels by SPA compared to *S. Typhimurium*  
99 (STM) (20), and demonstrated differences in the regulatory setup of the flagella-chemotaxis pathway  
100 between these serovars (21, 22).

101 Here, to further understand the different pathogenicity of SPA vs. STM as prototypic NTS, we set  
102 out to compare their transcriptional architecture, during non-phagocytic host cell infection. Surprisingly,

103 in sharp contrast to the expression pattern in LB grown culture, we show that intracellular SPA is motile  
104 and induces the expression of SPI-1 and flagellar genes, compared to intracellular STM. In addition, we  
105 demonstrate that SPA and STM diverge in the intracellular expression of genes for citrate and  
106 ethanolamine metabolism and in their ability to utilize these carbon sources in vitro. We hypothesize  
107 that these differences are pivotal for the distinct diseases resulting from SPA vs. STM infection, and their  
108 different interactions with the human host.

## 110 RESULTS

### 112 The intracellular transcriptomic landscape of *S. Typhimurium*

113 Although STM and SPA belong to the same species, share about 89 % of their genes and express  
114 many common virulence factors (23), the disease they cause in immunocompetent humans is very  
115 different. One possible reason, expected to contribute to their different pathogenicity is a distinct  
116 expression of genes involved in host-pathogen interactions. To test this hypothesis, we compared the  
117 transcriptomic architecture and gene activity of SPA or STM in a disease-relevant context of epithelial  
118 cell infection. We chose to sample *Salmonella* infection at 8 h p.i. when the pathogen is considered to be  
119 well engaged in replication and optimally adapted to the intracellular environment (24). Thus, HeLa cells  
120 were infected with fluorescent STM and SPA for 8 h and sorted by flow cytometry to isolate *Salmonella*-  
121 infected cells. Isolated RNA was deep-sequenced (RNA-Seq), aligned to the corresponding *Salmonella*  
122 genome and compared to the transcriptome of *Salmonella* cultures growing extracellularly in rich LB  
123 medium.

124 RNA extracted from three independent infection experiments of HeLa cells infected with STM have  
125 generated 496-575 million RNA-Seq reads (human and bacterial reads) per experiment. Of which, 4.9-

126 6.6 million sequence reads, assigned to non-rRNA bacterial genes were used for intracellular bacterial  
127 transcriptome analysis. Three independent extracellular STM cultures grown in LB, were used as a  
128 reference control, from which we obtained 4.3-13.8 million RNA-seq informative reads that were  
129 assigned to non-rRNA bacterial genes. To analyze the STM gene expression, we calculated for each gene  
130 the number of transcripts per kilobase million (TPM) from its feature read count counts. The expression  
131 level threshold was set to a TPM value of 10 or above (25). Altogether, we identified 1,018 distinct genes  
132 that were exclusively expressed by STM during intracellular infection of HeLa cells and 191 distinct genes  
133 that were expressed only when STM was grown in LB. 3,127 transcripts were commonly expressed at  
134 both conditions (Fig. 1A and Table S1).

135 RNA-seq successfully identified 365 upregulated and 465 downregulated genes that were changed  
136 by at least twofold inside epithelial cells at 8 h p.i. (adjusted p-value  $\leq 0.05$ ) by STM, relative to their  
137 expression in LB (Fig. 2A and Table S2). In agreement with previous studies (14, 26, 27), during STM  
138 infection, at least 27 genes belonging to the flagella-motility regulon and several genes (*fimAWYZ*) from  
139 the type I fimbriae were significantly repressed. Interestingly, the expression of genes encoding the Saf  
140 fimbriae (*safABCD*) were upregulated during HeLa cell infections by STM.

141 In contrast to the flagella and the *fim* genes, at least 31 genes from the PhoPQ regulon were highly  
142 induced intracellularly (Fig. 2B). The two-component system PhoPQ, orchestrates *Salmonella* adaptation  
143 to the intracellular milieu and regulates a wide array of genes central for *Salmonella* virulence including  
144 those encoded on SPI-2 (28, 29). Correspondingly, we identified upregulation of the SPI-2 regulon  
145 including *ssaBCDEGHIJKLMVNOPRSTU*, *sseABCDEFGIJL*, *sseK3*, *sspH2*, *pipB*, *pipB2*, and *steC* genes (Fig.  
146 2B). These results are consistent with the known notion that SPI-2 expression is induced during  
147 intracellular replication of *Salmonella* (15, 30) and with previous reports that studied STM expression  
148 during macrophages infection (31, 32). Other PhoP-regulated genes including *pgtE* (involved in bacterial

149 resistance to antimicrobial peptides), *pagN* (encoding an adhesion/invasion protein), *phoN* (acid  
150 phosphatase) and *pagCDJKO* were also induced (Fig. 2B).

151 Iron is an essential micronutrient required by nearly all bacterial species, including *Salmonella*.  
152 Limiting the availability of the nutrient metals to intracellular pathogens is one of the main mechanisms  
153 of nutritional immunity. In return, *Salmonella* uses a variety of high-affinity iron uptake systems to  
154 compete with the host for essential transition metals required for its intracellular growth (33). Indeed,  
155 we identified elevated expression of multiple iron (*entABEFH* and *iroNBCDE*), iron/ manganese (*sitABCD*),  
156 zinc (*zntR*, *zitT* and *znuA*), and magnesium (*mgtAB*) acquisition system genes, highlighting the essentiality  
157 of these metal ions for STM intracellular replication (Fig. 2B).

158 More than 100 suitable carbon substrates as well as various nitrogen, phosphorus and sulfur sources  
159 are available to invading pathogens, at different niches of the vertebrate hosts (34, 35). Interestingly,  
160 multiple genes belonging to the ethanolamine operon (*eutQTMGAC*) and genes involved in glycerol  
161 (*glpABDK*), and maltose (*maltEKM*) metabolism were particularly induced during STM infection (Fig. 2B).  
162 Nevertheless, the most highly induced metabolic gene was *uhpT*, encoding a hexose phosphate  
163 transporter that was upregulated by more than 40-fold at 8 h p.i. These results suggest that sugar  
164 phosphates are major substrates required for cytosolic intracellular proliferation of STM within HeLa  
165 cells, but also that ethanolamine, glycerol and maltose could be utilized as alternative carbon sources in  
166 epithelial cells.

167 Similarly, biotin (*bioABCDF*), purine (*nrdefHI* and *purDEHKL*), and sulfate/thiosulfate (*cysACHITW*  
168 and *sufABCDES*) biosynthetic metabolic pathways were highly transcribed intracellularly by STM.  
169 Moreover, genes involved in biosynthesis of the amino acids histidine (*hisACDFH* and *hutG*), tryptophan  
170 (*trpABDE*), and glutamine (*glnAGKL*), and genes that catalyze the cleavage of N-acetylneuraminic acid



171 (sialic acid; Neu5Ac) to form pyruvate and N-acetylmannosamine (ManNAc) (*nanAEKT* and *nagB*) were  
172 also upregulated by STM during HeLa cell infections (Fig. 2B).

173 A large number of genes involved in phosphate metabolism were identified to be induced within  
174 HeLa cells. For example, the transcriptional levels of *pstABCS* (encoding an ATP-dependent phosphate  
175 uptake system), which is responsible for inorganic phosphate uptake during phosphate starvation,  
176 *ugpABCEQ*, *phoR* and *apeE* were markedly increased. The *ugp* operon is involved in hydrolysis of diesters  
177 during their transport at the cytoplasmic side of the inner membrane (36). Thereby, sn-glycerol-3-  
178 phosphate (G3P) is generated and used as a phosphate source. The *upg* operon is regulated by a two-  
179 component system, PhoBR, which also regulates the outer membrane esterase, ApeE (37). Additional  
180 genes belonging to the PhoB regulon, such as *phnSVWU* encoding the phosphonate pathway, which is  
181 responsible for breaking down phosphonate and yielding cellular phosphate (38) were also significantly  
182 induced.

183 Collectively, these results suggest that STM likely experiences iron, biotin, purine and phosphate  
184 deprivation in host epithelial cells and induces the expression of genes involved in their transport and  
185 utilization. In addition, these results imply that ethanolamine, glycerol and maltose are available sources  
186 of carbon for STM in epithelial cells.

### 187 **The intracellular transcriptomic landscape of *S. Paratyphi A***

188 RNA-Seq analysis was similarly applied for intracellular SPA. 313.8 to 805.9 million dual-RNASeq  
189 reads were obtained from three independent HeLa cell cultures infected with SPA. Out of these, 14.6 to  
190 36.6 million sequence reads were assigned to non-rRNA SPA genes and used to determine the  
191 intracellular SPA transcriptome (Table S3). As a reference control, RNA extracted from SPA grown in LB  
192 from three independent cultures generated 7.3 to 23 million informative reads (assigned to non rRNA  
193 SPA genes). Overall, we identified 322 genes that were exclusively expressed (TPM  $\geq 10$ ) by SPA during

194 infection of HeLa cells compared to 576 genes that were expressed only by extracellular SPA in LB culture.  
195 2,995 SPA genes were expressed at both conditions (Fig. 1B and Table S3).

196 At 8 h p.i. of HeLa cells, 322 genes were upregulated and 579 genes were down-regulated (Fig. 3A  
197 and Table S4) by twofold or more (adjusted p-value  $\leq 0.05$ ). Like in intracellular STM, the genes for type  
198 I (Fim) fimbriae (*fimCIWYZ*) and additional fimbria clusters including Bcf (*bcfDE*), the Curli (*csgBCDE*), Stb  
199 (*stbBE*), Stc (*stcABC*), Stf (*stfAD*), Sth (*sthABCD*), and Stk (*stkABC*) were all strongly downregulated  
200 intracellularly (Fig. 3B). Noteworthy, the downregulation of type I (*fimACIZ*), Curli (*csgBDE*) and Bcf  
201 (STM14\_0037 and *bcfB*) fimbriae was more pronounced in SPA than in STM (Fig. S1), indicating that the  
202 SPA fimbriome is robustly repressed, during intracellular replication, while some basal level of expression  
203 of these fimbrial genes is still maintained during STM infection.

204 In contrast, but consistent with our findings for intracellular STM, genes belonging to the PhoPQ  
205 (including polymyxins resistance) and SPI-2 regulons were significantly induced by intracellular SPA.  
206 Moreover, various transition metals import systems including manganese and iron transporter (*sitABCD*),  
207 enterobactin biosynthesis system (*entABCDEF* and *fepAG*) and the iron ABC transporter IroC were  
208 considerably upregulated during SPA HeLa cell infection (Fig. 3B).

209 In addition, the expression of several metabolic pathways that were significantly elevated during  
210 STM infection were induced by intracellular SPA as well, including biotin (*bioABCDF*) and purine  
211 (*purCDEHKL*) biosynthesis genes. Further overlap in the intracellular transcriptome of these pathogens  
212 includes several amino acid biosynthesis pathways such as glutamine (*glnAGKLPQ*), tryptophan  
213 (*trpABCDE*) and histidine (*hisAFGHI*) that were upregulated in both intracellular STM and SPA.

214 Nevertheless, comparison of the intracellular transcriptome between STM and SPA, during HeLa  
215 cells infection, identified 234 differentially expressed genes (DEGs; Table S5), indicating that some  
216 pathways may function differently during the intracellular phase of STM vs. SPA. These differences

217 included the induction of several amino acids biosynthesis genes which expression was more pronounced  
218 in intracellular SPA than in STM. These include biosynthesis genes of glycine (*glyASU*), isoleucine  
219 (*ilvCDEG*), leucine (*leuABCD*), lysine (*lysAC* and *sucBD*), methionine (*metCEFHKLR*), serine (*serAC*), and  
220 threonine (*thrBC*). In contrast, the threonine degradation pathway (*tdcABCDEG*) was found to be  
221 repressed in intracellular SPA. These results may suggest that SPA relies more than STM on amino acids  
222 as an available carbon and energy source during epithelial cell infection. Additional pathways that were  
223 found upregulated in SPA, but not in STM are the oxidative phosphorylation (*nuoEFGHIJKLMN* and  
224 *atpCD*), and peptidoglycan cell wall formation (*murACDEG*) pathway genes (Fig. 3B). Remarkably, further  
225 differences between the intracellular transcriptome of SPA vs. STM included different expression profiles  
226 of the SPI-1, motility and chemotaxis, and carbon utilization regulons as detailed in the following sections.

### 228 **Differences in carbon catabolism during intracellular infection of *S. Paratyphi A* and *S. Typhimurium***

229 In order to survive, persist and replicate in host cells, intracellular pathogens must adapt their  
230 metabolic pathways to the specific physical conditions and available nutrients found in the intracellular  
231 environment. Carbon catabolism provides bacteria with energy by means of reducing equivalents, ATP  
232 and essential biosynthetic precursors. Different studies have suggested that hexose monosaccharides  
233 such as glucose and glucose-6P are the main source of carbon during *Salmonella* infection (39-43).  
234 Comparison of the metabolic gene expression between intracellular STM and SPA revealed significant  
235 differences in the expression profile of several carbon catabolic pathways. For example, the gene *uhpT*  
236 encoding an antiporter for external hexose 6-phosphate and internal inorganic phosphate (44) presented  
237 about 90-fold higher expression by intracellular STM than SPA (Fig. 4A). This different expression might  
238 be because the sensor-regulator system encoded by *uhpABC* is defective by pseudogene formation in  
239 SPA (45). Similarly, the gene coding for galactonate permeases (*dgoT*) was upregulated in intracellular

240 STM, but not in SPA, suggesting that STM utilizes more hexose 6-phosphate and galactonate than SPA as  
241 a carbon source during intracellular growth.

242 Similarly, RNA-Seq identified that at least seven genes involved in citrate metabolism including  
243 *citCDEFTX* and *citC2* exhibited higher transcription levels in intracellular STM than SPA (Fig. 4A).  
244 Independent qRT-PCR further confirmed that the intracellular expression of *citA* and *citX* encoding  
245 citrate-proton symporter and apo-citrate lyase phosphoribosyl-dephospho-CoA transferase, respectively  
246 is lower by about 3- and 10-fold in SPA infected cells vs. STM (Fig. 4B).

247 STM can utilize ethanolamine as a sole source of carbon, nitrogen, and energy in a cobalamin  
248 (vitamin B12)-dependent manner. Ethanolamine may be important to STM growth in the host, since it is  
249 derived from the membrane phospholipid phosphatidylethanolamine that is particularly prevalent in the  
250 gastrointestinal tract. This process involves breakdown of the precursor molecule  
251 phosphatidylethanolamine by phosphodiesterases to glycerol and ethanolamine (46). In STM,  
252 ethanolamine catabolism involves 17 genes organized in the *eut* operon, controlled by the transcriptional  
253 activator EutR (47). At least six ethanolamine catabolism genes (*eutSPQTGH*) were expressed at higher  
254 levels by intracellular STM compared to SPA (Fig. 4A). These differences were independently verified by  
255 qRT-PCR that showed significantly reduced expression of *eutG*, *eutP* and *eutQ* genes in intracellular SPA  
256 vs. STM (Fig. 4B).

257 Collectively, these observations suggest that STM is able to better utilize intracellular citrate,  
258 ethanolamine and galactonate as intracellular carbon sources than SPA, and that SPA may use an  
259 alternative carbon source such as amino acids during intracellular growth.

260 To further test this hypothesis, we compared the growth of SPA and STM in a defined M9 medium  
261 supplemented with ethanolamine or citrate as a carbon source. Growth under anaerobic conditions in  
262 M9 medium, supplemented with ethanolamine, without amino acids, did not allow bacterial growth of

263 neither STM nor SPA. Adding casamino acids, without additional carbon source, resulted in a minimal  
264 and comparable growth of both STM and SPA, likely due to the utilization of amino acids as a restricted  
265 carbon source. Nevertheless, adding ethanolamine as a *bona fide* carbon source to the medium resulted  
266 with increased and rapid growth of STM, but with a minor improvement of SPA growth (relative to its  
267 growth on amino acids only; Fig. 4C), indicating the ability of STM, but not SPA to efficiently ferment  
268 ethanolamine. Replacing the carbon source with citrate under aerobic growth conditions allowed  
269 delayed, but substantial growth of STM, in comparison to restricted and slower growth of SPA (Fig. 4D).  
270 These results are concurring with the expression data and indicate a better ability of STM than SPA to  
271 utilize both ethanolamine and citrate as a sole carbon source. These differences may also contribute to  
272 a higher intracellular replication pace of STM than SPA found in HeLa cells (Fig. S2).

## 273

### 274 **Intracellular *S. Paratyphi A* expresses SPI-1 genes at higher levels than intracellular *S.*** 275 ***Typhimurium***

276 Previously we showed that under extracellular aerobic growth conditions in LB, SPI-1 gene  
277 expression, as well as secretion of SPI-1-T3SS effector proteins, occur at significantly lower levels in SPA  
278 compared to STM (20). Here, in sharp contrast, we found that intracellular SPA transcribed significantly  
279 higher levels of SPI-1 and T3SS-1-effector genes than intracellular STM (Fig. 5A). This was clearly evident  
280 ( $\log_2$  change  $\geq 2$  and  $p$ -value  $\leq 0.05$ ) for at least 14 SPI-1 genes including the SPI-1 regulators *hilA* and  
281 *hilD*, the effector genes *sopBDF*, the T3SS-1 structural genes *invCHIJ* and *spaOPQ*, *sigE* encoding a  
282 chaperon (a.k.a. *pipC*) and *iagB* (Table S5).

283 Independent qRT-PCR was used to verify these observations and demonstrated that intracellular SPA  
284 transcribed *hilA*, *hilD*, *invH*, *sopB*, *sopD* and *spaO* at 4- to 27-fold higher levels than STM (Fig. 5B).  
285 Moreover, Western blotting against a 2HA-tagged version of SopB and SopE2 further indicated elevated

286 translation of these two SPI-1 effectors in intracellular SPA vs. STM (Fig. 5C). Collectively these results  
287 indicate that SPA expresses SPI-1 genes at higher levels during infection of non-phagocytic cells, in  
288 comparison to intracellular STM.

289  
290 **Intracellular *S. Paratyphi A* is motile and expresses flagella-chemotaxis genes at higher levels**  
291 **than *S. Typhimurium***

292 Functional flagella are necessary for *Salmonella* motility and invasion of host cells (21, 48, 49). In *S.*  
293 *enterica*, more than 50 genes are involved in the assembly and motion of flagella, organized in one  
294 regulon that composes three ordered regulatory phases corresponding to classes I (early), II (middle),  
295 and III (late) (50).

296 Previous studies have shown that the genes coding the flagellar machinery, as well as many genes  
297 involved in chemotaxis, are strongly repressed during STM intracellular lifestyle (27, 31, 32). Here, RNA-  
298 Seq analysis has demonstrated that at least 38 out of 50 chemotaxis and flagella genes, belonging to class  
299 II and III of the flagella regulon are expressed at significantly higher levels in intracellular SPA compared  
300 to STM (Fig. 6A and Table S5). These include the flagellin gene *fliC* that was expressed at 11-fold higher  
301 levels by SPA vs. STM, and many other flagellar genes including *flgC* that demonstrated 64-fold difference  
302 in its expression between intracellular SPA vs. STM. In addition to the flagellar genes, SPA residing in the  
303 host cell presented much higher expression levels of chemotaxis genes (e.g. *cheB*, *cheR*, *cheM*, *cheW*,  
304 *cheZ*, and *cheY*) than intracellular STM.

305 Independent qRT-PCR analysis confirmed these results and showed that in sorted infected HeLa  
306 cells, the expression of *fliC*, *fliZ*, *flgM*, *flgF*, *cheA* or *cheB* was 8- to 130-fold higher in intracellular SPA  
307 than in intracellular STM (Fig. 6B). In agreement with the RNA-seq and qRT-PCR analyses, Western

blotting using anti-FliC antibodies demonstrated significantly higher translation of FliC in intracellular SPA vs. STM (Fig. 6C). Taken together, these findings uncover significantly higher expression levels of motility and chemotaxis genes by SPA vs. STM within infected HeLa cells.

To further analyze if the increased expression of motility genes by intracellular SPA has physiological consequences, we investigated the possible presence of flagella in intracellular SPA. Immunostaining of intracellular SPA at 8 h p.i. indeed indicated the presence of flagella filaments on intracellular SPA (Fig. S3). Flagella staining was absent for a  $\Delta fliC$  strain of SPA, and restored in the plasmid-complemented SPA  $\Delta fliC$ . No immunolabeling of flagella was observed for intracellular STM WT or STM  $\Delta fliC \Delta fljB$  (Fig. S3).

### **Motile intracellular SPA are more inclined to replicate in the cytoplasm rather than the SCV**

Analysis of host cells infected by STM or SPA WT or T3SS-2-deficient strains was performed. To distinguish *Salmonella* in the SCV from *Salmonella* in other compartments or in the cytosol, and to enable live-cell imaging of infected host cells, we used LAMP1-GFP expressing HeLa host cells (Fig. 7, Movies 1, 4). Lifeact-GFP expressing HeLa cells were used to investigate potential interactions with the host cell actin cytoskeleton (Movie 1-3).

More than 80% of STM WT were present in SCV with associated *Salmonella*-induced filaments (SIFs; Fig. 7A, Fig.8). STM WT was observed residing in SCV and the majority of infected host cells showed formation of extensive SIF networks. The STM *ssaV* strain was typically present in SCV, but tubular endosomal filaments were almost absent. A smaller proportion of host cells (ca. 10%) harbored cytosolic STM, and for these cells, massive cytosolic proliferation or hyper-replication was evident (Fig. 7A). For intracellular SPA WT, more heterogeneous phenotypes were observed (Fig. 7BCDE). SPA was located residing in the SCV, or present in the cytosol without association with LAMP1-positive membranes.

330 Intracellular SPA also induced SIF in a T3SS-2-dependent manner, but the frequency of SIF-positive cells  
331 was much lower with ca. 9% for SPA WT compared to more than 80% for STM WT (Fig. 7BC, Fig. 8). SPA-  
332 infected host cells often contained thin SIF, that are likely composed of single-membrane tubules, in  
333 contrast to SIF with more intense LAMP1-GFP signal, indicating double-membrane tubules (Fig. 7BC). For  
334 SPA WT, SIF formation was significantly less frequent, yet dependent on T3SS-2. The frequency of SPA  
335 associated with SCV marker LAMP1 was highly reduced compared to STM. As intracellular SPA was  
336 observed to reside in tightly enclosing SCV (51), we considered flagella expression by vacuolar SPA less  
337 likely than by cytosolic bacteria. Because transcriptional analyses showed expression of flagellar genes  
338 by intracellular SPA, flagella filaments were detected on intracellular SPA, and a major proportion of  
339 infected HeLa cells (~ 40%) harbored cytosolic SPA, we investigated the functional consequences of  
340 flagella expression by live-cell imaging of *Salmonella*-infected host cells (Movies 1-4). Indeed, we  
341 observed actively motile intracellular SPA in about 40% of the infection host cells.

342 As motility in intracellular microbes typically is mediated by polymerization of host cell actin by  
343 microbial surface proteins (52), we investigated F-actin dynamics in SPA-infected HeLa Lifeact-GFP cells  
344 (Movie 1). No association of F-actin with static or motile intracellular SPA was evident, and F-actin trails  
345 as observed for intracellular motile *Listeria monocytogenes* (53) were absent in SPA WT infected cells.  
346 No cytosolic motility was observed for intracellular STM. To control if cytosolic motility is linked to the  
347 observed flagella expression, we used a SPA *fliC* mutant strain. This non-motile mutant completely lacked  
348 cytosolic motility, but showed increased presence in SCV (Fig. 8, Movie 1). Cytosolic motility of SPA was  
349 not affected in the T3SS-deficient  $\Delta$ *ssaR* strain (Fig. 8, Movie 1). Live-cell imaging at high frame rates  
350 (Movies 2 and 3) demonstrated the dynamics of intracellular motility of SPA in real time, with  
351 characteristic alternations between straight swimming and stops with tumbling. Analyses of the vectors



of individual SPA indicated collisions with the host cell plasma membrane, but there were no indications for formations of protrusions as observed for intracellular motile *L. monocytogenes* (53).

We next set out to analyze the broader relevance of intracellular motility of SPA and investigated a set of clinical SPA isolates (22), and SPA reference strains of SARB collection (54). We observed that all SPA strains tested showed intracellular motility in HeLa cells (Movie 4). Expression of flagella genes and presence of flagella filaments was previously demonstrated for STM in dead host cells extruded from polarized epithelial monolayers (55). As these experiments were performed with STM strain SL1344, we also analyzed this strain in our experimental setting. As for STM ATCC 14028, also STM SL1344 showed cytosolic hyper-replication in infected HeLa cells, but cytosolic motility was absent (Movie 4).

These data confirm that the expression of flagella by intracellular SPA leads to flagella-mediated cytosolic motility, and that this motility is a conserved trait specific to SPA.

### **Intracellular SPA are primed for reinfection of host cells**

We set out to investigate potential functional consequences of the increased expression of SPI-1 and motility genes by intracellular SPA. We hypothesized that increased expression of SPI-1, higher amounts of T3SS-1 effector proteins, and motility could affect the interaction of SPA released from infected cells with naïve host cells. As host cell decay and release of the intracellular *Salmonella* is asynchronous, and quantification of new infection events is difficult in gentamicin protection assays, we set up a re-invasion assay that provides experimental control. HeLa cells were infected by invasive *Salmonella*, at a defined time point of 8 h p.i., host cells were osmotically lysed, and released bacteria were used to reinfect new epithelial cells. The number of viable bacteria in inoculum, released from initially infected host cells, and the number of bacteria in the second round of invasion were quantified (Fig. 9A).

374 We determined similar levels of invasion by SPA after microaerobic culture and STM after aerobic  
375 subculture (3.25% and 3.41% of inoculum, respectively), while STM after microaerobic subculture  
376 invaded less efficiently (0.47%). Interestingly, 6.88% of the SPA released from HeLa cells at 8 h p.i. were  
377 capable of reinvasion of naïve HeLa cells. In contrast, only 0.91% of released STM were able to invade,  
378 and reinvasion of STM after microaerobic culture was lower with 0.75%. These data indicate that higher  
379 expression of SPI-1 genes and bacterial motility by intracellular SPA results in increased invasiveness of  
380 SPA following exit from host cells (Fig. 9B).

## 382 DISCUSSION

383 Despite high genetic similarity, typhoid and non-typhoidal *Salmonella* serovars differ hugely in their  
384 host specificity, the immune response they elicit in humans, and the clinical manifestations they cause  
385 (56). Previously, we showed differences in host cell invasion and SPI-1 expression between STM and SPA,  
386 following extracellular growth in rich medium LB under aerobic conditions (20) and demonstrated that  
387 elevated physiological temperature affects differently their motility and host cell entry (22, 51).

388 In this work, we focused on their intracellular phase of infection and have taken an unbiased deep  
389 RNA-Seq approach to get a panoramic view of the intracellular STM and SPA transcriptomic architecture,  
390 and to identify differences in the activity of their genes in the intracellular milieu. Following transition  
391 from extracellular to the intravacuolar environment, *Salmonella* undergoes extensive adaptation and  
392 global modulation of gene expression to respond to the intracellular environment, however the  
393 nutritional contents of the SCV and the metabolic pathways required during intracellular growth are  
394 largely undefined. Amino acids and purines seem to be deficient since previous studies have shown that  
395 many auxotrophic *Salmonella* mutants are unable to grow intracellularly and are severely attenuated for

396 virulence in mice (57-60). These observations suggest that intracellular *Salmonella* depend on *de novo*  
397 synthesis of metabolic precursors.

398 Recently, Liu and colleagues have applied a proteomic approach to determine the expression of  
399 STM proteins within HeLa cells at 6 (61) and 18 h (27) p.i. Also, the STM transcriptome inside  
400 macrophages (31, 32) and epithelial cells (26) has been reported previously. Nevertheless, a global  
401 transcriptomic comparison between SPA and STM during intracellular infection has not been published  
402 thus far.

403 Previous efforts to identify changes in gene expression using quantitative proteomic approach (LC-  
404 MS/MS analyses) have revealed that among about 3,000 detected proteins, the expression of 100  
405 *Salmonella* proteins significantly changed (61 were upregulated and 39 proteins were downregulated)  
406 during the transition of STM from the extracellular to the intracellular niche of HeLa cells, at 6 h p.i. (61).  
407 A microarray hybridization-based technique has identified 605 upregulated and 616 downregulated STM  
408 genes at 6 h p.i. of HeLa cells (26). Our current transcriptomic analysis identified 830 differentially  
409 expressed STM genes (365 upregulated and 465 downregulated) that were altered at 8 h p.i., relative to  
410 their extracellular expression. Similar numbers of DEGs were also detected for SPA, which presented 322  
411 upregulated and 579 downregulated genes, during epithelial cell infection.

412 In agreement with these previous analyses, we observed substantial downregulation in the  
413 expression of genes associated with SPI-1, Type I fimbriae, flagella and chemotaxis systems in STM, but  
414 significant upregulation of STM genes involved in metal ions uptake, purines and biotin synthesis. In fact,  
415 nearly all known *Salmonella* iron-, zinc-, or manganese-responsive pathways were found to be  
416 intracellularly induced. Since the SCV is characterized by low levels of magnesium, manganese, iron and  
417 zinc metals (62) and given the pivotal role of these metal ions in *Salmonella* infection (63, 64),  
418 upregulation of iron, zinc and manganese acquisition system genes is not surprising. Nonetheless, these

419 results highlight the importance of biotin and purines to the intracellular phase of *Salmonella* during  
420 infection. This notion is consistent with (i) SCVs of both macrophage and epithelial cells are limited for  
421 purines and pyrimidines (65); (ii) the avirulent phenotype of purine auxotrophic mutants of *S.*  
422 Typhimurium and *S. Dublin* in mice (59); and (iii) the reported contribution of biotin sulfoxide reductase  
423 to oxidative stress tolerance and virulence of *Salmonella* in mice (66).

424 Interestingly, in contrast to the proteomics (61) and the microarray-based transcriptome analyses  
425 (26), we were also able to identify significant upregulation of SPI-2 and PhoPQ regulon genes both in STM  
426 and SPA. These differences may reflect the time point differences (8 h p.i. in our analysis vs. 6 h p.i. in  
427 previous analyses), or the superior sensitivity of the current RNA-Seq techniques.

428 While the change in the expression of metal transport systems, purines, biotin, PhoPQ and SPI-2  
429 regulons was common to both SPA and STM, intriguing differences in the expression profile of SPI-1,  
430 motility and chemotaxis, and carbon utilization pathways (mainly citrate, galactonate and ethanolamine)  
431 were identified between intracellular SPA and STM. Ethanolamine is a ubiquitous molecule within  
432 vertebrate hosts and serves as a carbon and nitrogen source for bacteria in the intestine, as well as within  
433 epithelial cells (67). *Salmonella* can utilize ethanolamine, as an exclusive source of carbon and nitrogen,  
434 generating acetaldehyde and ammonia. The ammonia can then provide a cellular supply of reduced  
435 nitrogen, while the acetaldehyde can be converted into the metabolically useful compound acetyl-CoA  
436 (68). Our data indicated much higher expression of multiple ethanolamine utilization genes by STM vs.  
437 SPA during host cell infection and more efficient utilization *in-vitro*. Recently, it was shown that  
438 ethanolamine metabolism in the intestine enables STM to establish infection and that EutR, the  
439 transcription factor of the ethanolamine cluster in *Salmonella* directly activates the expression of SPI-2  
440 in the intracellular environment (69, 70).

441 The sugar acid galactonate is another example of an available carbon and energy source that is  
442 produced in the mammalian gut. The gut microbiota releases sugar acids including galactonate from  
443 ingested polysaccharides present in nutrients by the host, or from simple sugars as catabolic  
444 intermediates of metabolism (71). These results may suggest that STM utilizes galactonate, citrate and  
445 ethanolamine more effectively than SPA as available carbon sources, and that STM may better  
446 coordinate ethanolamine metabolism and virulence via EutR during infection. This notion is consistent  
447 with our *in-vitro* data showing that while STM is able to utilize ethanolamine and citrate as a sole carbon  
448 source, SPA cannot grow or grows much slower on these sources. Previous studies have shown that  
449 deficiency for citrate lyase activity (*citF*) leads to significant reduction in STM survival inside macrophages  
450 (72) and that an STM mutant that cannot utilize citrate is highly attenuated in the mouse (73). Similarly,  
451 ethanolamine is released by host tissues during inflammation and a study by Thiennimitr and colleagues  
452 in mice has shown that ethanolamine metabolism provides a growth advantage to STM during intestinal  
453 colonization (70). Since SPA provokes a noninflammatory disease, it is possible that SPA has lost the  
454 ability to utilize ethanolamine as it provides no advantage during noninflammatory infection.

455 It is well established that the expression of the flagella and chemotaxis are highly repressed by  
456 intracellular STM (27, 31, 61, 74), supporting a nonmotile state of intracellular STM. In agreement with  
457 these reports, we have also observed extensive repression of the entire motility-chemotaxis regulon in  
458 intracellular STM, however we found significantly higher expression of this regulon in intracellular SPA.  
459 Similar observations were also obtained for the evolutionary related T3SS-1 genes. Most salmonellae are  
460 motile and express peritrichous flagella around its membrane. Like T3SS-1, *Salmonella* motility is playing  
461 an important role in host colonization and virulence (75, 76). Previous reports have shown a regulatory  
462 association between T3SS-1 and the flagella in STM (77). Subsequent to STM entry into host cells, the  
463 intracellular expression of T3SS-1 (27, 31, 78) as well as flagella production and chemotaxis (27, 31, 61,  
464 79) genes were shown to be highly repressed, possibly to prevent inflammatory response by the

465 NAIP/NLRC4 inflammasome (80). Therefore, it was unexpected to find that the flagella regulon is readily  
466 expressed during SPA intracellular infection and that it maintains an intracellular motility during epithelial  
467 cell infection.

468 Intracellular motility is long known in bacterial pathogens such as *Listeria monocytogenes*, *Shigella*  
469 *flexneri*, *Rickettsia* spp., and *Burkholderia* spp., that all exhibit intracellular actin-based motility to spread  
470 from cell to cell (81). Nonetheless, to the best of our knowledge, this is the first report of a flagellum-  
471 dependent intracellular motility of any *Salmonella* serovar in living host cells. While we did not find  
472 evidence for intercellular spread, it is possible that this mechanism facilitates escape of SPA from the SCV  
473 to the cytoplasm. Previous studies have shown that a small subpopulation of hyper-replicating STM  
474 resides within the cytosol of epithelial cells and serves as a reservoir for dissemination. These motile  
475 bacteria retain both SPI-1 and flagella expression, but present a low expression of SPI-2 genes, and  
476 therefore are primed for invasion (82). This expression profile is largely similar to the intracellular profile  
477 of SPA. Indeed, we showed that intracellular SPA possesses higher ability to reinfect non-phagocytic cells  
478 than intracellular STM. We propose that elevated expression of motility-chemotaxis and SPI-1 genes in  
479 addition to flagella-mediated motility prime SPA towards a new cycle of host cell infection, supporting  
480 systemic dissemination of this pathogen in the human body. These phenotypes may contribute to the  
481 invasive nature of paratyphoid fever and the ability of SPA to disseminate beyond the intestinal lamina  
482 propria of the human host. Future work has to reveal which cells or tissues of infected host organisms  
483 are affected by intracellular motility of SPA. However, such analyses are hampered by the lack of animal  
484 models for infection. Infection models with human organoids (83), for examples based on gall bladder  
485 epithelial organoids (84) as a tissue type important for SPA persistence and dissemination, may offer new  
486 perspectives for analyses of cellular interactions.

## 488 MATERIAL AND METHODS

489  
490 **Bacterial strains, growth conditions and data sets.** Bacterial strains utilized in this study are listed  
491 in **Table S6** . *S. Typhimurium* 14028 S (85) and *S. Paratyphi* A strain 45157, an epidemic strain, responsible  
492 for a paratyphoid outbreak in Nepal (9) were used as the wild-type strains. Bacterial cultures were  
493 routinely maintained in Luria-Bertani (LB; BD Difco) liquid medium at 37°C. An M9 medium [33.7 mM  
494 Na<sub>2</sub>HPO<sub>4</sub>, 22 mM KH<sub>2</sub>PO<sub>4</sub>, 8.5 mM NaCl, 18.7 mM NH<sub>4</sub>Cl, 12.1% Trizma base, pH=7.4] supplemented with  
495 2 mM MgSO<sub>4</sub>, 0.3 mM CaCl<sub>2</sub>, 3.7 μM thiamine, 4.1 μM biotin, 0.134 mM EDTA, 31 μM FeCl<sub>3</sub>, 6.2 μM ZnCl<sub>2</sub>,  
496 7.6 nM CuCl<sub>2</sub>, 4.2 nM CoCl<sub>2</sub>, 1.62 μM H<sub>3</sub>BO<sub>3</sub>, 8.1 nM MnCl<sub>2</sub>, with or without 0.1% Casamino acids, and  
497 with one of the following carbon sources glucose (11 mM), ethanolamine hydrochloride (51 mM) or  
498 sodium citrate (34 mM) was used as a minimal growth medium.

499 For HeLa cell infections, *Salmonella* cultures were grown to the stationary phase under  
500 microaerobic conditions (see below). The final dataset for RNA-seq included 12 samples resulting from  
501 three independent growth in LB or infection experiments that were used for RNA extraction: (i) *S.*  
502 *Typhimurium* 14028 S bacterium grown in LB medium (hereafter named STM\_m) (ii) *S. Paratyphi* A strain  
503 45157 grown in LB medium (hereafter named SPA\_m) (iii) *Typhimurium* 14028 S bacterium infected HeLa-  
504 cells (hereafter named STM\_i) and (iv) *S. Paratyphi* A strain 45157 bacterium in HeLa-cells (hereafter  
505 named SPA\_i).

506 **Infection of HeLa cells.** Human epithelial HeLa (ATCC CCL-2) cells were purchased from the  
507 American Type Culture Collection and were cultured in a high-glucose (4.5 g/l) DMEM supplemented with  
508 10% FBS, 1 mM pyruvate and 2 mM L-glutamine at 37 °C in a humidified atmosphere with 5% CO<sub>2</sub>. Cells  
509 were seeded at 6×10<sup>6</sup> cells/ml in a onewell plate (Greiner) tissue culture dish 18 h prior to bacterial  
510 infection and infected at multiplicity of infection (MOI) of ~200 (bacteria per cell). For RNA extraction,  
511 five plates for *S. Typhimurium* and six plates for *S. Paratyphi* A were used. *Salmonella* strains carrying the

pBR-GFP2 plasmid were grown in 2 ml LB containing 20 µg/ml tetracycline at 37 °C with shaking (250 rpm) for 6-8 h, and then diluted 1:75 into 10 ml LB supplemented with 20 µg/ml tetracycline and grown without shaking at 37 °C for 16 h. Bacterial cultures were centrifuged for 5 min at 4,629 × g, at room temperature (RT), and resuspended in 3 ml prewarmed complete DMEM. 3 ml of DMEM suspended Salmonellae (~2.5×10<sup>9</sup> CFU) were used to replace the medium of seeded cells and plates were centrifuged for 5 minutes at 142 × g at RT. After centrifugation, 7 ml of prewarmed DMEM were added and plates were incubated at 37 °C under 5% CO<sub>2</sub> atmosphere. At 2 h post infection (p.i.) the medium was aspirated, cells were washed three times with 10 ml PBS containing CaCl<sub>2</sub> and MgCl<sub>2</sub> (PBS +/+), and incubated with 10 ml prewarmed DMEM containing 100 µg/ml gentamicin. After 60 min, the media was replaced with DMEM containing 10 µg/ml gentamicin and cells were further incubated as before. At 8 h p.i., the cells were washed three times with 10 ml PBS +/+ and trypsinized with 2 ml prewarmed trypsin at 37 °C. When the cells were detached, prewarmed DMEM was added to quench the trypsin. The cells were transferred to a 50 ml conical tube, precipitated by 5 min centrifugation at 247 x g and washed in 15 ml PBS+/. Finally, the cells were resuspended in 1 ml / plate fixation reagent (RNAlater: RNAProtect 350:1), incubated at RT for 20 min, and then stored at 4 °C until sorting.

HeLa cell lines stably transfected for expression of LAMP1-GFP or Lifeact-GFP have been described before (86) and were maintained and infected as described above.

**FACS sorting and RNA extraction.** RNA was extracted from three independent infection experiments of HeLa cells with STM strain ATCC 14028S or SPA 45157. As controls, RNA was also extracted from three independent cultures of uninfected cells and from bacterial cultures grown in LB. HeLa cells (infected or uninfected) were fixed, centrifuged at 247 × g for 5 min and resuspended in 3 ml PBS+/. The cells were filtered through 30 µm pre-separation filter into 5 ml FACS tubes (SARSTEDT) and sorted on a BD-FACSAria IIu (100 µm nozzle; ND filter 2) at a rate of approximately 300 cells/sec. 2-



535 2.5×10<sup>6</sup> GFP-positive (infected) HeLa cells were collected and centrifuged at 247 × g for 5 min. RNA  
536 extraction was performed using Hybrid-R RNA Purification System (GeneAll). RNA samples were treated  
537 with RNase-free DNase (Qiagen) according to manufacturer's protocol, followed by ethanol precipitation  
538 and Ribosomal RNA depletion that was performed by Epidemiology Ribo-Zero Gold rRNA Removal Kit  
539 (Illumina).

540 **RNA sequencing.** RNAseq was performed at the GeT-PlaGe core facility, INRAE Toulouse. RNA-  
541 seq libraries were prepared using the Illumina TruSeq Stranded mRNA Library Prep, without a poly-A  
542 mRNA selection, according to the manufacturer's protocol. Briefly, RNAs were fragmented to generate  
543 double-stranded cDNA and adaptors were ligated. 11 cycles of PCR were applied to amplify the libraries  
544 and their quality was assessed using a Fragment Analyser. Libraries were quantified by qPCR using the  
545 Kapa Library Quantification Kit (Roche). To reach 5 million bacterial reads for each sample, as  
546 recommended in (87), RNA-seq reads were generated from three lanes of an Illumina HiSeq3000 and  
547 two lanes of an Illumina NOVAseq6000 using a paired-end read length of 2×150 bp. Ribosomal RNA  
548 (rRNA) reads were filtered out using sortmerna-2.1b (88) against Silva and Rfam databases. The raw reads  
549 data for this study have been deposited in the European Nucleotide Archive (ENA) at EMBL-EBI  
550 under accession number PRJEB46495 and as specified in Table S7.

551 **Genome annotation and quality control.** A flowchart summarizing the RNA-seq pipeline and  
552 bioinformatic analyses is shown in Fig. S4. Annotation of SPA 45157 and STM 14028S genomes was  
553 performed using EugenePP 1.2 (89) with general and targeted evidence to predict coding genes and  
554 noncoding features (Figure S1). Functional prediction was produced with InterProscan v5.15-54.0 with  
555 GO terms, COG version COG2014 (90), REBASE v708 (91), IslandViewer4 (92) and PHAST (93).

556 Structural and regulatory non-coding RNA were annotated using RNAspace software v1.2.1 (94)  
557 together with the following tools: RNAmmer 1.2 for rRNA (95), tRNAscan-SE 1.23 for tRNA (96) and blastn

558 2.2.25 against RFAM 10.0 for other ncRNA (97). The gff3 files produced by Eugene and RNA annotation  
559 were merged by a semi-manually procedure using BEDTools-2.26.0 (98).

560 FastQC v0.11.7 was used for quality control of the raw sequence data. Cutadapt 1.8.3 was used  
561 to remove Illumina Truseq adaptors and to filter out all reads with length shorter than 36 nucleotides.

562 **Reads mapping and counting.** The remaining, non rRNA reads were mapped with STAR-2.6.0c  
563 (99), with default parameters, against a “hybrid” genome composed by the Ensembl GRCh38 human  
564 primary assembly (release 92) and the SPA (accession number CP076727) or STM (accession number  
565 CP001362 - CP001363) genomes. In addition, in order to analyze bacterial samples, we indexed each  
566 bacterial genome separately by decreasing the parameter “genomeSAindexNbases” to 10 for STM and  
567 to 9 for SPA, while producing the alignment (.bam) files sorted by coordinates. Samtools flagstat v1.8 was  
568 used to obtain mapping statistics. Then we added read groups to trace the origin of each read with  
569 AddOrReplaceReadGroups of Picard tools v2.18.2. Next, we merged the bam files that originated from  
570 resequencing of the same sample using the MergeSamFiles command of Picard tools. The featureCounts  
571 command from the Subread-1.6.0 tool (100) was used to compute fractional counting for all annotated  
572 genes.

573 **Clustering of orthologous genes.** Orthologous genes were computed using Roary v.3.11.2 (101)  
574 with default parameters (minimum of 95% identity between coding sequences of the same cluster)  
575 except for the “-s” option that avoids paralog splitting in different clusters. Based on the orthologous  
576 groups, we produced raw count matrices that compare the expression level between orthologous genes  
577 of SPA and STM. We also added groups including paralog genes on either SPA or STM genome into the  
578 raw count matrix to sum up the raw reads count of each putative paralog gene.

579 **Differential Gene expression analysis.** Normalization and differential analysis were carried out  
580 according to the DESeq2 model and package (102) using adjusted p-value with FDR correction and the

581 Wald test to infer the probability value. Genes that had too few reads (the sum of reads for all the  
582 samples was less than 10) were discarded. To compare DEGs between SPA and STM, we created a count  
583 matrix composed of the shared protein-coding and ncRNA genes between these two serovars. The  
584 heatmaps were created by applying DESeq2 variance stabilizing transformations (the `vst` command) on  
585 the counts followed by subtracting the mean of the gene across all samples. The heatmaps were drawn  
586 using the ComplexHeatmap R package (103).

587 **Reverse transcription and quantitative real-time PCR (qRT-PCR).** 500 ng of RNA was reverse-  
588 transcribed using qScript cDNA synthesis kit (Quanta-bio). Real-time PCR was performed as previously  
589 described (20) on a StepOnePlus Real-Time PCR System (Applied Biosystems). Relative quantity of  
590 transcripts was calculated as  $2^{-\Delta\Delta Ct}$ , using the *rpoD* gene as an endogenous normalization control.

591 **Western Blotting.** HeLa cells were infected with *Salmonella* strains carrying pBR-GFP2 plasmid  
592 and pWSK29 carrying HA-tagged alleles of *sopE2* and *sopB*. The infection procedure was performed as  
593 above until the fixation step. Cell fixation was performed by incubation with 5 ml of 4% formaldehyde  
594 for 15 min under gentle shaking. Five ml of PBS +/+ were added and the cells were centrifuged for 5 min  
595 at  $2,700 \times g$ . Subsequently, the cells were washed three times with PBS +/+ and finally resuspended in  
596 PBS +/+ containing 1% BSA. The cells were stored at 4 °C until sorting.  $1 \times 10^6$  GFP-positive cells were  
597 centrifuged for 5 min at  $247 \times g$ , and resuspended in 100  $\mu$ l sample buffer. Western blot of the infected  
598 cells was performed as previously described (104) using the anti-2HA (Abcam ab18181; 1:1,000), anti-  
599 FliC (Abcam ab93713; 1:200,000) and anti-DnaK (Abcam ab69617; 1:10,000). Proteins were quantified  
600 relative to DnaK using ImageJ.

601 **Host cell infection and live-cell imaging.** HeLa cells stably transfected with LAMP1-GFP were  
602 seeded in surface-treated 8-well slides (ibidi) 24 or 48 h prior to infection to reach ~80% confluency  
603 (~80,000 cells) and were then used for infection. STM strains for infection experiments were subcultured

604 from an overnight culture (1:31) in fresh LB medium and grown for 3.5 h at 37°C. For infection, SPA strains  
605 were grown for 8 h under aerobic conditions, subcultured (1:100) in fresh LB medium and stationary-  
606 phase subcultures were grown for 16 h under microaerophilic conditions as described in (21). Bacteria  
607 were adjusted to an optical density of 0.2 at 600 nm in PBS and used for infection with the respective  
608 MOI (between 25 and 100, dependent on strain). Bacteria were centrifuged onto the cells for 5 min at  
609 500 × g to synchronize infection and the infection was allowed to proceed for 25 min. After washing  
610 thrice with PBS, cells were incubated in medium containing 100 µg × ml<sup>-1</sup> of gentamicin to kill extracellular  
611 bacteria. Afterwards, the cells were maintained in medium supplemented with 10 µg × ml<sup>-1</sup> gentamicin  
612 for the ongoing experiment. Live-cell imaging was performed with Cell Observer Spinning Disc  
613 microscope (Zeiss) equipped with a Yokogawa Spinning Disc Unit CSU-X1a5000, an incubation chamber,  
614 63× objective (α-Plan-Apochromat, NA 1.4), two ORCA Flash 4.0 V3 cameras (Hamamatsu) and  
615 appropriate filters for the respective fluorescence proteins.

616 **Immunostaining of infected cells.** HeLa cells stably transfected with LAMP1-GFP were seeded in  
617 surface-treated 24-well plates (TPP) on coverslips 24 h or 48 h prior infection to reach ~80% confluency  
618 (~180,000 cells) and were used for infection. Cultivation of bacteria and infection of HeLa cells was  
619 carried out as described above. After the desired incubation time the cells were washed thrice with PBS  
620 and fixed with 3% PFA in PBS for 15 min at RT, followed by immunostaining. Fixed cells were washed  
621 thrice with PBS and incubated in blocking solution (2% goat serum, 2% bovine serum albumin, 0.1%  
622 saponin, 0.2 % Triton X-100) for 30 min. Cells were stained 1 h at RT with primary antibodies against  
623 *Salmonella* (H:i, BD Difco 228241; H:a, Sifin TR1401; O:5, Sifin TR5303). After washing thrice with PBS,  
624 cells were incubated with the appropriate secondary antibodies for 1 h at RT. Coverslips were mounted  
625 with Fluoroshield (Sigma) and sealed with Entellan (Merck). Microscopy of fixed samples was either  
626 performed using a Cell Observer Spinning Disc microscope (Zeiss) as described above, or using a Leica

627 SP5 confocal laser-scanning microscope using 100× objective (HCX PL APO CS, NA 1.4-0.7) and polychroic  
628 mirror TD 488/543/633.

629 **Reinvasion assays.** HeLa cells were seeded in surface-treated 6-well plates (TPP) 24 h or 48 h prior  
630 to infection to reach ~100% confluency ( $1 \times 10^6$  cells) on the day of infection. Infection cultures of STM  
631 and SPA strains were grown as either 3.5 h aerobic or 16 h microaerobic subcultures and used for  
632 infection as described above. At 1 h p.i., cells were washed thrice with PBS and lysed using 0.1% Triton  
633 X-100. CFU were determined by plating serial dilutions of lysates and inoculum on Mueller-Hinton II (MH)  
634 agar and incubated overnight at 37 °C. The percentage of internalized bacteria of the inoculum (from  
635 subcultures) was calculated. 8 h p.i., cells were washed twice with PBS, once with ice-cold ddH<sub>2</sub>O, and  
636 lysed using ddH<sub>2</sub>O. Bacteria liberated from host cells by hypotonic lysis were used to infect naïve HeLa  
637 cells, and 1 h p.i. cells were washed and lysed and CFU were determined as described above. The  
638 percentage of internalized bacteria of the inoculum (from liberated bacteria) was calculated.

639

## 640 **ACKNOWLEDGMENTS**

641 This work was supported by the Infect-Era program, SalHostTrop project (“Understanding the  
642 Human-Restricted Host Tropism of Typhoidal Salmonella”, 2016-2020) and by the France Génomique  
643 National infrastructure, funded as part of “Investissement d’avenir” program managed by Agence  
644 Nationale pour la Recherche (ANR-10-INBS-09 contract). The work at the Gal-Mor laboratory was  
645 supported by grant numbers: 2616/18 from the joint ISF-Broad Institute program; 3-12435 from Infect-  
646 Era /Chief Scientist Ministry of Health; I-41-416.6-2018 from the German-Israeli Foundation for Scientific  
647 Research and Development (GIF, awarded to OGM and MH); and A128055 from the Research  
648 Cooperation Lower Saxony – Israel (The Volkswagen Foundation, awarded to OGM, MH and GG). The

649 funders had no role in study design, data collection, and interpretation, or the decision to submit the  
650 work for publication. We thank C. Gaspin for providing annotation of ncRNA genes of the STM and SPA  
651 genomes.

652

653 **FIGURE LEGENDS**

654 **Figure 1. The number of STM and SPA genes expressed in LB medium and during intracellular**  
655 **growth.** *Salmonella* RNA-seq reads were aligned to *S. Typhimurium* 14028S and *S. Paratyphi A* 45157  
656 genomes and normalized by transcripts per million (TPM) transformation. Genes with  $\text{TPM} \geq 10$  were  
657 considered as expressed. The number of expressed genes in STM (A) and SPA (B) growing in LB medium  
658 to the late logarithmic phase and within HeLa cells at 8 h p.i. is shown.

659 **Figure 2. DEGs of intracellular *S. Typhimurium* compared to growth in LB medium. (A)** Volcano  
660 plots showing the fold change ( $\log_2$  ratio) in the expression of STM genes grown intracellularly in HeLa  
661 cells (8 h p.i.) vs. the growth in LB medium (X-axis) plotted against the  $-\log_{10}$  adjusted p-value (Y-axis).  
662 Each dot on the plot represents the mean value (from three independent cultures) of one gene. Genes  
663 that were changed by more than twofold are colored in red. (B) Heatmap based on RNA-Seq results  
664 showing the relative transcription of STM genes of interest during intracellular infection (C1 to C3) vs.  
665 their extracellular expression in LB medium (M1 to M3).

666 **Figure 3. DEGs of intracellular *S. Paratyphi A* compared to growth in LB medium. (A)** Volcano  
667 plots showing the fold change ( $\log_2$  ratio) in the expression of SPA genes grown intracellularly in HeLa  
668 cells (8 h p.i.) vs. the growth in LB medium (X-axis) plotted against the  $-\log_{10}$  adjusted p-value (Y-axis).  
669 Each dot on the plot represents the mean value (from three independent cultures) of one gene. Genes  
670 that were changed by more than twofold are colored in red. (B) Heatmap based on RNA-Seq results  
671 showing the relative transcription of SPA genes of interest during intracellular infection (C1 to C3) vs.  
672 their extracellular expression in LB medium (M1 to M3).

673 **Figure 4. Differences in carbon utilization gene expression between STM and SPA. (A)** Heatmap  
674 of carbon catabolism gene expression by intracellular STM vs. intracellular SPA. Pseudogenes in the SPA  
675 genome are marked with an asterisk. (B) The fold change in the transcription of the glucose-6P (*uhpT*),

676 citrate (*citA* and *citX*), and ethanolamine (*eutP*, *eutQ* and *eutG*) utilization pathways in intracellular STM  
677 relative to their expression in intracellular SPA was determined using qRT-PCR. RNA was extracted from  
678 FACS-sorted intracellular salmonellae 8 h p.i. The mean and the standard error of the mean of 3-8  
679 independent qRT-PCR reactions are shown. Student t-test was used to determine statistical significance.  
680 \*\*,  $p < 0.005$ ; \*\*\*,  $p < 0.0001$ ; ND, not detected. (C) Growth of STM and SPA in M9 in the presence (+) or  
681 absence (-) of casamino acids (AA) and ethanolamine (ETA), under anaerobic conditions. (D) Growth of  
682 STM and SPA in M9 supplemented with citrate as a sole carbon source.

683 **Figure 5. Intracellular SPA expresses higher levels of SPI-1 genes than intracellular STM.** (A) Heat  
684 map of RNA-Seq results showing the relative transcription of SPI-1 genes in three independent HeLa cell  
685 infections with STM and SPA. (B) The fold change in the transcription of six SPI-1 genes (*hilA*, *hilD*, *invH*,  
686 *sopB*, *sopD* and *spaO*) in intracellular SPA relative to their expression in intracellular STM was determined  
687 by qRT-PCR. The results show the mean of 3-6 qRT-PCR reactions and the error bars indicate the SEM.  
688 (C) SPA and STM strains expressing GFP and a 2HA-tagged version of the SPI-1 effectors SopE2 and SopB  
689 were used to infect HeLa cells. At 8 h p.i., cells were fixed and FACS-sorted for infected (GFP-positive  
690 cells). Infected HeLa cells ( $1 \times 10^6$  for each sample) were collected and separated on 12% SDS-PAGE.  
691 Western blotting using anti-hemagglutinin (HA) tag antibodies was used to detect the intracellular  
692 expression of SopE2 and SopB. Anti-DnaK antibodies were used as a loading control.

693 **Figure 6. Intracellular SPA expresses higher levels of motility-chemotaxis genes than intracellular**  
694 **STM.** (A) Heat map of RNA-Seq results showing the relative transcription of the motility-chemotaxis  
695 regulon in three independent HeLa cells infections with STM and SPA. (B) The fold change in the  
696 transcription of six flagellum genes (*fliC*, *fliZ*, *glgM*, *flgF*, *cheA* and *cheB*) in intracellular SPA relative to  
697 their expression in intracellular STM was analyzed by qRT-PCR. The results show the mean of 3-5  
698 independent reactions and the error bars indicate the SEM. (C) SPA and STM strains expressing GFP were



699 used to infect HeLa cells. At 8 h p.i., cells were fixed and FACS-sorted. Equal numbers of  $1 \times 10^6$  infected  
700 HeLa cells were collected, lysed, and proteins were separated on 12% SDS-PAGE. Western blotting using  
701 anti-FliC antibodies were used to detect synthesis of FliC by intracellular *Salmonella*. Anti-DnaK  
702 antibodies were used as a loading control.

703 **Figure 7. Distinct phenotypes of intracellular SPA.** HeLa cells stably transfected for expression of  
704 LAMP1-GFP (green) were infected with STM WT (**A**, MOI 25) or SPA WT (**B-E**, MOI 75), each harboring  
705 pFPV-mCherry for constitutive expression of mCherry (red). Live-cell imaging was performed at 8 h p.i.  
706 Images are shown as maximum intensity projection. Arrowheads indicate subpopulations with distinct  
707 phenotypes in infected cells: SIF (green), thin SIF (green with asterisk), *Salmonella* residing in SCV  
708 (yellow), cytosolic *Salmonella* (red), hyper-replicating cytosolic *Salmonella* (red with asterisk). Scale bars:  
709 10  $\mu\text{m}$  (overview), 5  $\mu\text{m}$  (inset).

710 **Figure 8. Quantification of intracellular phenotypes.** HeLa cells stably expressing LAMP1-GFP  
711 (green) were infected with *Salmonella* strains expressing mCherry (red). Quantification of intracellular  
712 phenotypes was performed with a Zeiss Cell Observer with 63x objective. From 6-8 h p.i. at least 100  
713 infected cells per strain (for SPA *fliC* at least 50) were examined for intracellular phenotype. Data  
714 represent the means with standard deviations for three biological replicates for each strain and  
715 condition. Statistical analysis was performed with One-way ANOVA and is indicated as n.s., not  
716 significant; \*,  $p < 0.05$ ; \*\*,  $p < 0.01$ ; \*\*\*,  $p < 0.001$ .

717 **Figure 9. SPA shows higher invasion after release out of infected cells. (A)** HeLa cells were infected  
718 with STM WT or SPA WT at MOI 5, and invasion by each strain was determined by gentamicin protection  
719 assays. At 8 h p.i., one portion of infected cells was lysed by hypotonic conditions, and the released  
720 bacteria were used to reinfect naive HeLa cells. **(B)** Intracellular CFU counts were determined 1 h p.i.  
721 after initial infection (invasion, black bars), or 1 h p.i. after infection with *Salmonella* released from host  
722 cells at 8 h p.i. (reinvasion, grey bars). Depicted are means and SD of three biological replicates, each

723 performed in triplicate. For statistical analysis, Student's t-test was performed. Significance is indicated  
724 as n.s., not significant; \*,  $p < 0.05$ ; \*\*,  $p < 0.01$ ; \*\*\*,  $p < 0.001$ .

## 726 SUPPLEMENTARY MATERIALS

727 **Fig. S1. Expression of fimbriae genes in intracellular STM vs. SPA.** (A) Heat map of RNA-Seq  
728 results showing the relative transcription of genes encoding curli (Csg), Fim, or Bcf fimbriae in three  
729 independent HeLa cells infections with STM and SPA. (B) The x-fold change in the expression of *csgA* and  
730 *csgD* in intracellular SPA relative to their expression in intracellular STM was analyzed by qRT-PCR. The  
731 results show the means of 4-8 independent reactions and the error bars indicate the SEM.

732 **Fig. S2. Intracellular replication of SPA and STM in HeLa cells.** Intracellular growth of STM vs. SPA  
733 in HeLa cells at 2, 4, 6, 8 and 24 h p.i. Bacterial replication was determined by the gentamicin protection  
734 assay. Replication was calculated as the ratio between the intracellular bacteria (CFU) recovered at each  
735 time point and the number of CFU at 2 p.i. The means and the SEM of four independent infections are  
736 shown.

737 **Fig. S3. Formation of flagella by SPA within the host cell cytoplasm.** HeLa cells stably expressing  
738 LAMP1-GFP (green) were infected with SPA WT, SPA *fliC*, SPA *fliC* [*fliC*], STM WT, or STM *fliC fljB* as  
739 indicated, each constitutively expressing mCherry (red). Infected cells were fixed 8 h p.i. and  
740 subsequently immunolabeled with serovar-specific antibody against FliC (blue). Scale bars: 10  $\mu\text{m}$ .

741 **Fig. S4. A flowchart of RNA-seq and bioinformatic analyses.** The different steps and main tools  
742 used for the bioinformatic analyses illustrated. RNA extracted from STM and SPA grown in culture and  
743 from infected cells was subjected to NGS on Illumina sequencing. RNA-seq reads were cleaned and  
744 quality controlled using FastQC. Cutadapt was used to remove Illumina Truseq adaptors and to filter out  
745 all reads shorter than 36 nucleotides. SortMeRNA was used to filter out ribosomal RNA reads from raw

746 data. Human and bacterial genomes were merged into “Hybrid genomes” and indexed with STAR.  
747 Bacterial genomes were reannotated using EugenePP. STAR was used to align reads to reference  
748 genomes and sort resulting bam files by coordinates. To compute fractional counting for all annotated  
749 coding and non-coding genes the Subread tool with parameters “-s 2 (reversely stranded), -p (count  
750 fragments instead of reads) -M, -O, --fraction” was used. Clustering of *Salmonella* homologous genes was  
751 computed using Roary. Normalization and differential expressed genes analysis were carried out  
752 according to the DESeq2 model and package using adjusted P-value and the Wald test to infer the  
753 probability value. To obtain DEGs between STM and SPA a count matrix composed of the shared and  
754 coding genes and ncRNAs between these two serovars was created.

## 756 TABLES

757 **Table S1.** The transcriptome of STM grown in LB and intracellularly. The RNA-seq reads obtained from  
758 STM grown on LB or extracted from HeLa cells infected with STM were mapped to the STM 12048S  
759 genome. This table shows the normalized (TPM) featurecount counts of reads assigned to the STM genes.  
760 This table also lists the genes that were found expressed in LB only, intracellularly only, and at both  
761 conditions.

762 **Table S2.** DEGs of intracellular STM vs. LB.

763 **Table S3.** The transcriptome of SPA grown in LB or intracellular. The RNA-seq reads obtained from SPA  
764 grown on LB or extracted from HeLa cells infected with SPA were mapped to the SPA 45157 genome.  
765 This table shows the normalized (TPM) featurecount counts of reads assigned to the SPA genes. This  
766 table also lists the genes that were found expressed in LB only, intracellular only, and under both  
767 conditions.

768 **Table S4.** DEGs of intracellular SPA vs. LB.

769 **Table S5.** DEGs between intracellular STM and intracellular SPA.

770 **Table S6.** Bacterial strains and primers utilized in this study.

771 **Table S7.** RNA-Seq metadata and accession numbers of the 12 samples analyzed in this study.

772

773 **MOVIES**

774 **Movie 1. Live-cell imaging of STM and SPA strains reveals intracellular motility of SPA.** To  
775 investigate intracellular motility, HeLa cells stably expressing LAMP1-GFP (green) or LifeAct-GFP (green)  
776 as indicated were infected with SPA WT, SPA *ssaR*, SPA *fliC*, or STM ATCC 14028s WT, each harboring  
777 pFPV-mCherry for constitutive expression of mCherry (red). Individual clips of about 30 seconds are  
778 shown successively. Time stamps in upper left corner indicate sec.ms. Scale bars: 10  $\mu$ m.

779 **Movie 2. Real time imaging of intracellular motility of SPA WT.** HeLa cells stably expressing  
780 LifeAct-GFP (green) were infected with SPA WT expression mCherry (red) and imaged at a frame rate of  
781 ~40 frames per second. Time stamps in upper left corner indicate sec.ms. Scale bar: 10  $\mu$ m.

782 **Movie 3. Real time imaging of intracellular motility of SPA WT.** HeLa cells stably expressing  
783 LifeAct-GFP (green) were infected with SPA WT expression mCherry (red) and imaged at a frame rate of  
784 ~40 frames per second. Time stamps in upper left corner indicate sec.ms. Scale bar: 10  $\mu$ m.

785 **Movie 4. Live-cell imaging of further intracellular STM and SPA strains.** HeLa cells stably  
786 expressing LAMP1-GFP (green) were infected with STM SL1344 WT, or various isolates of SPA as indicated  
787 in the lower left corner of movie sections. All strains harbored pFPV-mCherry for constitutive expression  
788 of mCherry (red) Time stamps in upper left corner indicate sec.ms. Scale bars: 10  $\mu$ m.

789

790 REFERENCES

- 791 1. Gal-Mor O. 2019. Persistent Infection and Long-Term Carriage of Typhoidal and Nontyphoidal Salmonellae.  
792 Clin Microbiol Rev 32.
- 793 2. Kraus MD, Amatya B, Kimula Y. 1999. Histopathology of typhoid enteritis: morphologic and  
794 immunophenotypic findings. Mod Pathol 12:949-55.
- 795 3. Nguyen QC, Everest P, Tran TK, House D, Murch S, Parry C, Connerton P, Phan VB, To SD, Mastroeni P,  
796 White NJ, Tran TH, Vo VH, Dougan G, Farrar JJ, Wain J. 2004. A clinical, microbiological, and pathological  
797 study of intestinal perforation associated with typhoid fever. Clin Infect Dis 39:61-7.
- 798 4. Sprinz H, Gangarosa EJ, Williams M, Hornick RB, Woodward TE. 1966. Histopathology of the upper small  
799 intestines in typhoid fever. Biopsy study of experimental disease in man. Am J Dig Dis 11:615-24.
- 800 5. Crump JA, Luby SP, Mintz ED. 2004. The global burden of typhoid fever. Bull World Health Organ 82:346-  
801 53.
- 802 6. Havelaar AH, Kirk MD, Torgerson PR, Gibb HJ, Hald T, Lake RJ, Praet N, Bellinger DC, de Silva NR, Gargouri  
803 N, Speybroeck N, Cawthorne A, Mathers C, Stein C, Angulo FJ, Devleeschauwer B, World Health  
804 Organization Foodborne Disease Burden Epidemiology Reference G. 2015. World Health Organization  
805 Global Estimates and Regional Comparisons of the Burden of Foodborne Disease in 2010. PLoS Med  
806 12:e1001923.
- 807 7. Meltzer E, Schwartz E. 2010. Enteric fever: a travel medicine oriented view. Curr Opin Infect Dis 23:432-7.
- 808 8. Ochiai RL, Wang X, von Seidlein L, Yang J, Bhutta ZA, Bhattacharya SK, Agtini M, Deen JL, Wain J, Kim DR,  
809 Ali M, Acosta CJ, Jodar L, Clemens JD. 2005. *Salmonella* paratyphi A rates, Asia. Emerg Infect Dis 11:1764-  
810 6.
- 811 9. Gal-Mor O, Suez J, Elhadad D, Porwollik S, Leshem E, Valinsky L, McClelland M, Schwartz E, Rahav G. 2012.  
812 Molecular and cellular characterization of a *Salmonella enterica* serovar Paratyphi a outbreak strain and  
813 the human immune response to infection. Clin Vaccine Immunol 19:146-56.
- 814 10. Liu SL, Ezaki T, Miura H, Matsui K, Yabuuchi E. 1988. Intact motility as a *Salmonella typhi* invasion-related  
815 factor. Infect Immun 56:1967-73.
- 816 11. Abby SS, Rocha EP. 2012. The non-flagellar type III secretion system evolved from the bacterial flagellum  
817 and diversified into host-cell adapted systems. PLoS Genet 8:e1002983.
- 818 12. Zhou D, Galan J. 2001. *Salmonella* entry into host cells: the work in concert of type III secreted effector  
819 proteins. Microbes Infect 3:1293-8.
- 820 13. Haraga A, Ohlson MB, Miller SI. 2008. Salmonellae interplay with host cells. Nat Rev Microbiol 6:53-66.
- 821 14. Sekirov I, Gill N, Jogova M, Tam N, Robertson M, de Llanos R, Li Y, Finlay BB. 2010. Salmonella SPI-1-  
822 mediated neutrophil recruitment during enteric colitis is associated with reduction and alteration in  
823 intestinal microbiota. Gut Microbes 1:30-41.
- 824 15. Jennings E, Thurston TLM, Holden DW. 2017. Salmonella SPI-2 Type III Secretion System Effectors:  
825 Molecular Mechanisms And Physiological Consequences. Cell Host Microbe 22:217-231.
- 826 16. Raffatellu M, Chessa D, Wilson RP, Dusold R, Rubino S, Baumler AJ. 2005. The Vi capsular antigen of  
827 *Salmonella enterica* serotype Typhi reduces Toll-like receptor-dependent interleukin-8 expression in the  
828 intestinal mucosa. Infect Immun 73:3367-74.
- 829 17. Wangdi T, Winter SE, Baumler AJ. 2012. Typhoid fever: "you can't hit what you can't see". Gut Microbes  
830 3:88-92.
- 831 18. Winter SE, Winter MG, Thiennimitr P, Gerriets VA, Nuccio SP, Russmann H, Baumler AJ. 2009. The TviA  
832 auxiliary protein renders the *Salmonella enterica* serotype Typhi RcsB regulon responsive to changes in  
833 osmolarity. Mol Microbiol 74:175-93.
- 834 19. Winter SE, Winter MG, Poon V, Keestra AM, Sterzenbach T, Faber F, Costa LF, Cassou F, Costa EA, Alves  
835 GE, Paixao TA, Santos RL, Baumler AJ. 2014. *Salmonella enterica* Serovar Typhi conceals the invasion-  
836 associated type three secretion system from the innate immune system by gene regulation. PLoS Pathog  
837 10:e1004207.
- 838 20. Elhadad D, Desai P, Grassl GA, McClelland M, Rahav G, Gal-Mor O. 2016. Differences in Host Cell Invasion  
839 and SPI-1 Expression between *Salmonella enterica* serovar Paratyphi A and the Non-Typhoidal Serovar  
840 Typhimurium. Infect Immun doi:10.1128/IAI.01461-15.

- 841 21. Elhadad D, Desai P, Rahav G, McClelland M, Gal-Mor O. 2015. Flagellin Is Required for Host Cell Invasion  
842 and Normal Salmonella Pathogenicity Island 1 Expression by Salmonella enterica Serovar Paratyphi A.  
843 Infect Immun 83:3355-68.
- 844 22. Elhadad D, McClelland M, Rahav G, Gal-Mor O. 2015. Feverlike Temperature is a Virulence Regulatory Cue  
845 Controlling the Motility and Host Cell Entry of Typhoidal Salmonella. J Infect Dis 212:147-56.
- 846 23. McClelland M, Sanderson KE, Spieth J, Clifton SW, Latreille P, Courtney L, Porwollik S, Ali J, Dante M, Du F,  
847 Hou S, Layman D, Leonard S, Nguyen C, Scott K, Holmes A, Grewal N, Mulvaney E, Ryan E, Sun H, Florea L,  
848 Miller W, Stoneking T, Nhan M, Waterston R, Wilson RK. 2001. Complete genome sequence of *Salmonella*  
849 *enterica* serovar Typhimurium LT2. Nature 413:852-6.
- 850 24. Knodler LA, Steele-Mortimer O. 2003. Taking possession: biogenesis of the Salmonella-containing vacuole.  
851 Traffic 4:587-99.
- 852 25. Kroger C, Colgan A, Srikumar S, Handler K, Sivasankaran SK, Hammarlof DL, Canals R, Grissom JE, Conway  
853 T, Hokamp K, Hinton JC. 2013. An infection-relevant transcriptomic compendium for Salmonella enterica  
854 Serovar Typhimurium. Cell Host Microbe 14:683-95.
- 855 26. Hautefort I, Thompson A, Eriksson-Ygberg S, Parker ML, Lucchini S, Danino V, Bongaerts RJ, Ahmad N, Rhen  
856 M, Hinton JC. 2008. During infection of epithelial cells Salmonella enterica serovar Typhimurium  
857 undergoes a time-dependent transcriptional adaptation that results in simultaneous expression of three  
858 type 3 secretion systems. Cell Microbiol 10:958-84.
- 859 27. Liu Y, Yu K, Zhou F, Ding T, Yang Y, Hu M, Liu X. 2017. Quantitative Proteomics Charts the Landscape of  
860 Salmonella Carbon Metabolism within Host Epithelial Cells. J Proteome Res 16:788-797.
- 861 28. Deiwick J, Nikolaus T, Erdogan S, Hensel M. 1999. Environmental regulation of Salmonella pathogenicity  
862 island 2 gene expression. Mol Microbiol 31:1759-73.
- 863 29. Prost LR, Miller SI. 2008. The Salmonellae PhoQ sensor: mechanisms of detection of phagosome signals.  
864 Cell Microbiol 10:576-82.
- 865 30. Hensel M, Shea JE, Waterman SR, Mundy R, Nikolaus T, Banks G, Vazquez-Torres A, Gleeson C, Fang FC,  
866 Holden DW. 1998. Genes encoding putative effector proteins of the type III secretion system of Salmonella  
867 pathogenicity island 2 are required for bacterial virulence and proliferation in macrophages. Mol Microbiol  
868 30:163-74.
- 869 31. Eriksson S, Lucchini S, Thompson A, Rhen M, Hinton JC. 2003. Unravelling the biology of macrophage  
870 infection by gene expression profiling of intracellular Salmonella enterica. Mol Microbiol 47:103-18.
- 871 32. Srikumar S, Kroger C, Hebrard M, Colgan A, Owen SV, Sivasankaran SK, Cameron AD, Hokamp K, Hinton JC.  
872 2015. RNA-seq Brings New Insights to the Intra-Macrophage Transcriptome of Salmonella Typhimurium.  
873 PLoS Pathog 11:e1005262.
- 874 33. Ratledge C. 2007. Iron metabolism and infection. Food Nutr Bull 28:S515-23.
- 875 34. Brown SA, Palmer KL, Whiteley M. 2008. Revisiting the host as a growth medium. Nat Rev Microbiol 6:657-  
876 66.
- 877 35. Eisenreich W, Dandekar T, Heesemann J, Goebel W. 2010. Carbon metabolism of intracellular bacterial  
878 pathogens and possible links to virulence. Nat Rev Microbiol 8:401-12.
- 879 36. Brzoska P, Boos W. 1988. Characteristics of a *ugp*-encoded and *phoB*-dependent glycerophosphoryl  
880 diester phosphodiesterase which is physically dependent on the *ugp* transport system of *Escherichia coli*.  
881 J Bacteriol 170:4125-35.
- 882 37. Conlin CA, Tan SL, Hu H, Segar T. 2001. The *apeE* gene of Salmonella enterica serovar Typhimurium is  
883 induced by phosphate limitation and regulated by *phoBR*. J Bacteriol 183:1784-6.
- 884 38. Jiang W, Metcalf WW, Lee KS, Wanner BL. 1995. Molecular cloning, mapping, and regulation of *Pho*  
885 regulon genes for phosphonate breakdown by the phosphonate pathway of Salmonella typhimurium  
886 LT2. J Bacteriol 177:6411-21.
- 887 39. Bowden SD, Rowley G, Hinton JC, Thompson A. 2009. Glucose and glycolysis are required for the successful  
888 infection of macrophages and mice by Salmonella enterica serovar typhimurium. Infect Immun 77:3117-  
889 26.

- 890 40. Bowden SD, Hopper-Chidlaw AC, Rice CJ, Ramachandran VK, Kelly DJ, Thompson A. 2014. Nutritional and  
891 metabolic requirements for the infection of HeLa cells by *Salmonella enterica* serovar Typhimurium. *PLoS*  
892 *One* 9:e96266.
- 893 41. Lundberg BE, Wolf RE, Jr., Dinauer MC, Xu Y, Fang FC. 1999. Glucose 6-phosphate dehydrogenase is  
894 required for *Salmonella typhimurium* virulence and resistance to reactive oxygen and nitrogen  
895 intermediates. *Infect Immun* 67:436-8.
- 896 42. Romero M, Laorden ML, Hernandez J, Serrano JS. 1991. Evidence for involvement of catecholamines in the  
897 effect of morphine on ventricular automaticity in the rat. *J Auton Pharmacol* 11:93-9.
- 898 43. Tchawa Yimga M, Leatham MP, Allen JH, Laux DC, Conway T, Cohen PS. 2006. Role of gluconeogenesis and  
899 the tricarboxylic acid cycle in the virulence of *Salmonella enterica* serovar Typhimurium in BALB/c mice.  
900 *Infect Immun* 74:1130-40.
- 901 44. Gotz A, Goebel W. 2010. Glucose and glucose 6-phosphate as carbon sources in extra- and intracellular  
902 growth of enteroinvasive *Escherichia coli* and *Salmonella enterica*. *Microbiology (Reading)* 156:1176-1187.
- 903 45. Holt KE, Thomson NR, Wain J, Langridge GC, Hasan R, Bhutta ZA, Quail MA, Norbertczak H, Walker D,  
904 Simmonds M, White B, Bason N, Mungall K, Dougan G, Parkhill J. 2009. Pseudogene accumulation in the  
905 evolutionary histories of *Salmonella enterica* serovars Paratyphi A and Typhi. *BMC Genomics* 10:36.
- 906 46. Kaval KG, Garsin DA. 2018. Ethanolamine Utilization in Bacteria. *mBio* 9.
- 907 47. Kofoid E, Rappleye C, Stojiljkovic I, Roth J. 1999. The 17-gene ethanolamine (eut) operon of *Salmonella*  
908 *typhimurium* encodes five homologues of carboxysome shell proteins. *J Bacteriol* 181:5317-29.
- 909 48. Horstmann JA, Zschieschang E, Truschel T, de Diego J, Lunelli M, Rohde M, May T, Strowig T, Stradal T,  
910 Kolbe M, Erhardt M. 2017. Flagellin phase-dependent swimming on epithelial cell surfaces contributes to  
911 productive *Salmonella* gut colonisation. *Cell Microbiol* 19.
- 912 49. Misselwitz B, Barrett N, Kreibich S, Vonaesch P, Andritschke D, Rout S, Weidner K, Sormaz M, Songhet P,  
913 Horvath P, Chabria M, Vogel V, Spori DM, Jenny P, Hardt WD. 2012. Near surface swimming of *Salmonella*  
914 *Typhimurium* explains target-site selection and cooperative invasion. *PLoS Pathog* 8:e1002810.
- 915 50. Chilcott GS, Hughes KT. 2000. Coupling of flagellar gene expression to flagellar assembly in *Salmonella*  
916 *enterica* serovar typhimurium and *Escherichia coli*. *Microbiol Mol Biol Rev* 64:694-708.
- 917 51. Reuter T, Scharfe F, Franzkoch R, Liss V, Hensel M. 2021. Single cell analyses reveal distinct adaptation of  
918 typhoidal and non-typhoidal *Salmonella enterica* serovars to intracellular lifestyle. *PLoS Pathog*  
919 17:e1009319.
- 920 52. Welch MD, Way M. 2013. Arp2/3-mediated actin-based motility: a tail of pathogen abuse. *Cell Host*  
921 *Microbe* 14:242-55.
- 922 53. Pizarro-Cerda J, Cossart P. 2018. *Listeria monocytogenes*: cell biology of invasion and intracellular growth.  
923 *Microbiol Spectr* 6.
- 924 54. Boyd EF, Wang FS, Beltran P, Plock SA, Nelson K, Selander RK. 1993. *Salmonella* reference collection B  
925 (SARB): strains of 37 serovars of subspecies I. *J Gen Microbiol* 139 Pt 6:1125-32.
- 926 55. Ibarra JA, Knodler LA, Sturdevant DE, Virtaneva K, Carmody AB, Fischer ER, Porcella SF, Steele-Mortimer  
927 O. 2010. Induction of *Salmonella* pathogenicity island 1 under different growth conditions can affect  
928 *Salmonella*-host cell interactions in vitro. *Microbiology* 156:1120-33.
- 929 56. Gal-Mor O, Boyle EC, Grassl GA. 2014. Same species, different diseases: how and why typhoidal and non-  
930 typhoidal *Salmonella enterica* serovars differ. *Front Microbiol* 5:391.
- 931 57. Hoiseth SK, Stocker BA. 1981. Aromatic-dependent *Salmonella typhimurium* are non-virulent and effective  
932 as live vaccines. *Nature* 291:238-9.
- 933 58. Fields PI, Swanson RV, Haidaris CG, Heffron F. 1986. Mutants of *Salmonella typhimurium* that cannot  
934 survive within the macrophage are avirulent. *Proc Natl Acad Sci U S A* 83:5189-93.
- 935 59. McFarland WC, Stocker BA. 1987. Effect of different purine auxotrophic mutations on mouse-virulence of  
936 a Vi-positive strain of *Salmonella dublin* and of two strains of *Salmonella typhimurium*. *Microb Pathog*  
937 3:129-41.
- 938 60. O'Callaghan D, Maskell D, Liew FY, Easmon CS, Dougan G. 1988. Characterization of aromatic- and purine-  
939 dependent *Salmonella typhimurium*: attention, persistence, and ability to induce protective immunity in  
940 BALB/c mice. *Infect Immun* 56:419-23.



- 941 61. Liu Y, Zhang Q, Hu M, Yu K, Fu J, Zhou F, Liu X. 2015. Proteomic Analyses of Intracellular *Salmonella enterica*  
942 Serovar Typhimurium Reveal Extensive Bacterial Adaptations to Infected Host Epithelial Cells. *Infect*  
943 *Immun* 83:2897-906.
- 944 62. Osman D, Cavet JS. 2011. Metal sensing in *Salmonella*: implications for pathogenesis. *Adv Microb Physiol*  
945 58:175-232.
- 946 63. Ammendola S, Pasquali P, Pistoia C, Petrucci P, Petrarca P, Rotilio G, Battistoni A. 2007. High-affinity Zn<sup>2+</sup>  
947 uptake system ZnuABC is required for bacterial zinc homeostasis in intracellular environments and  
948 contributes to the virulence of *Salmonella enterica*. *Infect Immun* 75:5867-76.
- 949 64. Schaible UE, Kaufmann SH. 2004. Iron and microbial infection. *Nat Rev Microbiol* 2:946-53.
- 950 65. Finlay BB, Chatfield S, Leung KY, Dougan G, Falkow S. 1991. Characterization of a *Salmonella choleraesuis*  
951 mutant that cannot multiply within epithelial cells. *Can J Microbiol* 37:568-72.
- 952 66. Denkel LA, Rhen M, Bange FC. 2013. Biotin sulfoxide reductase contributes to oxidative stress tolerance  
953 and virulence in *Salmonella enterica* serovar Typhimurium. *Microbiology (Reading)* 159:1447-1458.
- 954 67. Bakovic M, Fullerton MD, Michel V. 2007. Metabolic and molecular aspects of ethanolamine phospholipid  
955 biosynthesis: the role of CTP:phosphoethanolamine cytidyltransferase (Pcyt2). *Biochem Cell Biol* 85:283-  
956 300.
- 957 68. Garsin DA. 2010. Ethanolamine utilization in bacterial pathogens: roles and regulation. *Nat Rev Microbiol*  
958 8:290-5.
- 959 69. Joseph B, Przybilla K, Stuhler C, Schauer K, Slaghuis J, Fuchs TM, Goebel W. 2006. Identification of *Listeria*  
960 *monocytogenes* genes contributing to intracellular replication by expression profiling and mutant  
961 screening. *J Bacteriol* 188:556-68.
- 962 70. Thiennimitr P, Winter SE, Winter MG, Xavier MN, Tolstikov V, Huseby DL, Sterzenbach T, Tsolis RM, Roth  
963 JR, Baumler AJ. 2011. Intestinal inflammation allows *Salmonella* to use ethanolamine to compete with the  
964 microbiota. *Proc Natl Acad Sci U S A* 108:17480-5.
- 965 71. Singh B, Arya G, Kundu N, Sangwan A, Nongthombam S, Chaba R. 2019. Molecular and Functional Insights  
966 into the Regulation of d-Galactonate Metabolism by the Transcriptional Regulator DgoR in *Escherichia coli*.  
967 *J Bacteriol* 201.
- 968 72. Arunima A, Yelamanchi SD, Padhi C, Jaiswal S, Ryan D, Gupta B, Sathe G, Advani J, Gowda H, Prasad TSK,  
969 Suar M. 2017. "Omics" of Food-Borne Gastroenteritis: Global Proteomic and Mutagenic Analysis of  
970 *Salmonella enterica* Serovar Enteritidis. *OMICS* 21:571-583.
- 971 73. Utley M, Franklin DP, Krogfelt KA, Laux DC, Cohen PS. 1998. A *Salmonella typhimurium* mutant unable to  
972 utilize fatty acids and citrate is avirulent and immunogenic in mice. *FEMS Microbiol Lett* 163:129-34.
- 973 74. Nunez-Hernandez C, Tierrez A, Ortega AD, Pucciarelli MG, Godoy M, Eisman B, Casadesus J, Garcia-del  
974 Portillo F. 2013. Genome expression analysis of nonproliferating intracellular *Salmonella enterica* serovar  
975 Typhimurium unravels an acid pH-dependent PhoP-PhoQ response essential for dormancy. *Infect Immun*  
976 81:154-65.
- 977 75. Schmitt CK, Ikeda JS, Darnell SC, Watson PR, Bispham J, Wallis TS, Weinstein DL, Metcalf ES, O'Brien AD.  
978 2001. Absence of all components of the flagellar export and synthesis machinery differentially alters  
979 virulence of *Salmonella enterica* serovar Typhimurium in models of typhoid fever, survival in macrophages,  
980 tissue culture invasiveness, and calf enterocolitis. *Infect Immun* 69:5619-25.
- 981 76. Stecher B, Hapfelmeier S, Muller C, Kremer M, Stallmach T, Hardt WD. 2004. Flagella and chemotaxis are  
982 required for efficient induction of *Salmonella enterica* serovar Typhimurium colitis in streptomycin-  
983 pretreated mice. *Infect Immun* 72:4138-50.
- 984 77. Lin D, Rao CV, Slauch JM. 2008. The *Salmonella* SPI1 type three secretion system responds to periplasmic  
985 disulfide bond status via the flagellar apparatus and the RcsCDB system. *J Bacteriol* 190:87-97.
- 986 78. Boddicker JD, Jones BD. 2004. Lon protease activity causes down-regulation of *Salmonella* pathogenicity  
987 island 1 invasion gene expression after infection of epithelial cells. *Infect Immun* 72:2002-13.
- 988 79. Nunez-Hernandez C, Alonso A, Pucciarelli MG, Casadesus J, Garcia-del Portillo F. 2014. Dormant  
989 intracellular *Salmonella enterica* serovar Typhimurium discriminates among *Salmonella* pathogenicity  
990 island 2 effectors to persist inside fibroblasts. *Infect Immun* 82:221-32.

- 991 80. Fattinger SA, Sellin ME, Hardt WD. 2021. Epithelial inflammasomes in the defense against Salmonella gut  
992 infection. *Curr Opin Microbiol* 59:86-94.
- 993 81. Kuehl CJ, Dragoi AM, Talman A, Agaisse H. 2015. Bacterial spread from cell to cell: beyond actin-based  
994 motility. *Trends Microbiol* 23:558-66.
- 995 82. Knodler LA, Vallance BA, Celli J, Winfree S, Hansen B, Montero M, Steele-Mortimer O. 2010. Dissemination  
996 of invasive Salmonella via bacterial-induced extrusion of mucosal epithelia. *Proc Natl Acad Sci U S A*  
997 107:17733-8.
- 998 83. Dutta D, Clevers H. 2017. Organoid culture systems to study host-pathogen interactions. *Curr Opin*  
999 *Immunol* 48:15-22.
- 000 84. Sepe LP, Hartl K, Iftekhar A, Berger H, Kumar N, Goosmann C, Chopra S, Schmidt SC, Gurumurthy RK, Meyer  
001 TF, Boccellato F. 2020. Genotoxic Effect of Salmonella Paratyphi A Infection on Human Primary Gallbladder  
002 Cells. *mBio* 11.
- 003 85. Jarvik T, Smillie C, Groisman EA, Ochman H. 2010. Short-term signatures of evolutionary change in the  
004 Salmonella enterica serovar typhimurium 14028 genome. *J Bacteriol* 192:560-7.
- 005 86. Lorkowski M, Felipe-Lopez A, Danzer CA, Hansmeier N, Hensel M. 2014. Salmonella enterica invasion of  
006 polarized epithelial cells is a highly cooperative effort. *Infect Immun* 82:2657-67.
- 007 87. Westermann AJ, Gorski SA, Vogel J. 2012. Dual RNA-seq of pathogen and host. *Nat Rev Microbiol* 10:618-  
008 30.
- 009 88. Kopylova E, Noe L, Touzet H. 2012. SortMeRNA: fast and accurate filtering of ribosomal RNAs in  
010 metatranscriptomic data. *Bioinformatics* 28:3211-7.
- 011 89. Sallet E, Gouzy J, Schiex T. 2014. EuGene-PP: a next-generation automated annotation pipeline for  
012 prokaryotic genomes. *Bioinformatics* 30:2659-61.
- 013 90. Galperin MY, Makarova KS, Wolf YI, Koonin EV. 2015. Expanded microbial genome coverage and improved  
014 protein family annotation in the COG database. *Nucleic Acids Res* 43:D261-9.
- 015 91. Roberts RJ, Vincze T, Posfai J, Macelis D. 2010. REBASE--a database for DNA restriction and modification:  
016 enzymes, genes and genomes. *Nucleic Acids Res* 38:D234-6.
- 017 92. Bertelli C, Laird MR, Williams KP, Simon Fraser University Research Computing G, Lau BY, Hoad G, Winsor  
018 GL, Brinkman FSL. 2017. IslandViewer 4: expanded prediction of genomic islands for larger-scale datasets.  
019 *Nucleic Acids Res* 45:W30-W35.
- 020 93. Zhou Y, Liang Y, Lynch KH, Dennis JJ, Wishart DS. 2011. PHAST: a fast phage search tool. *Nucleic Acids Res*  
021 39:W347-52.
- 022 94. Cros MJ, de Monte A, Mariette J, Bardou P, Grenier-Boley B, Gautheret D, Touzet H, Gaspin C. 2011.  
023 RNAspace.org: An integrated environment for the prediction, annotation, and analysis of ncRNA. *RNA*  
024 17:1947-56.
- 025 95. Lagesen K, Hallin P, Rodland EA, Staerfeldt HH, Rognes T, Ussery DW. 2007. RNAmmer: consistent and  
026 rapid annotation of ribosomal RNA genes. *Nucleic Acids Res* 35:3100-8.
- 027 96. Chan PP, Lowe TM. 2019. tRNAscan-SE: Searching for tRNA Genes in Genomic Sequences. *Methods Mol*  
028 *Biol* 1962:1-14.
- 029 97. Gardner PP, Daub J, Tate JG, Nawrocki EP, Kolbe DL, Lindgreen S, Wilkinson AC, Finn RD, Griffiths-Jones S,  
030 Eddy SR, Bateman A. 2009. Rfam: updates to the RNA families database. *Nucleic Acids Res* 37:D136-40.
- 031 98. Quinlan AR, Hall IM. 2010. BEDTools: a flexible suite of utilities for comparing genomic features.  
032 *Bioinformatics* 26:841-2.
- 033 99. Dobin A, Davis CA, Schlesinger F, Drenkow J, Zaleski C, Jha S, Batut P, Chaisson M, Gingeras TR. 2013. STAR:  
034 ultrafast universal RNA-seq aligner. *Bioinformatics* 29:15-21.
- 035 100. Liao Y, Smyth GK, Shi W. 2014. featureCounts: an efficient general purpose program for assigning sequence  
036 reads to genomic features. *Bioinformatics* 30:923-30.
- 037 101. Page AJ, Cummins CA, Hunt M, Wong VK, Reuter S, Holden MT, Fookes M, Falush D, Keane JA, Parkhill J.  
038 2015. Roary: rapid large-scale prokaryote pan genome analysis. *Bioinformatics* 31:3691-3.
- 039 102. Boddu D, George R, Nair S, Bindra M, L GM. 2014. Hydroa Vacciniforme-Like Lymphoma: A Case Report  
040 From India. *J Pediatr Hematol Oncol* doi:10.1097/MPH.000000000000221.

- 041 103. Gu Z, Eils R, Schlesner M. 2016. Complex heatmaps reveal patterns and correlations in multidimensional  
042 genomic data. *Bioinformatics* 32:2847-9.
- 043 104. Aviv G, Gal-Mor O. 2018. Western Blotting Against Tagged Virulence Determinants to Study Bacterial  
044 Pathogenicity. *Methods Mol Biol* 1734:47-54.

045

**A****S. Typhimurium**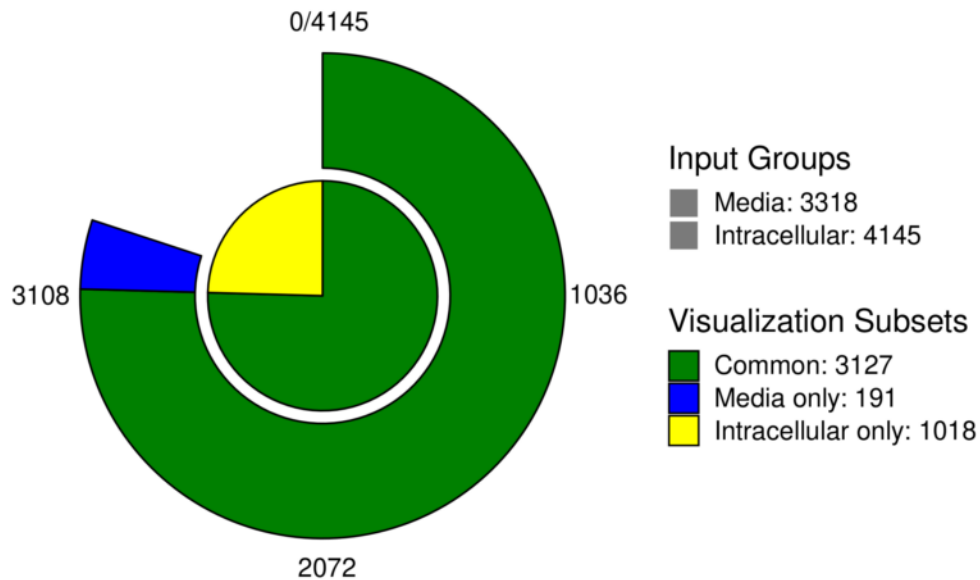**B****S. Paratyphi A**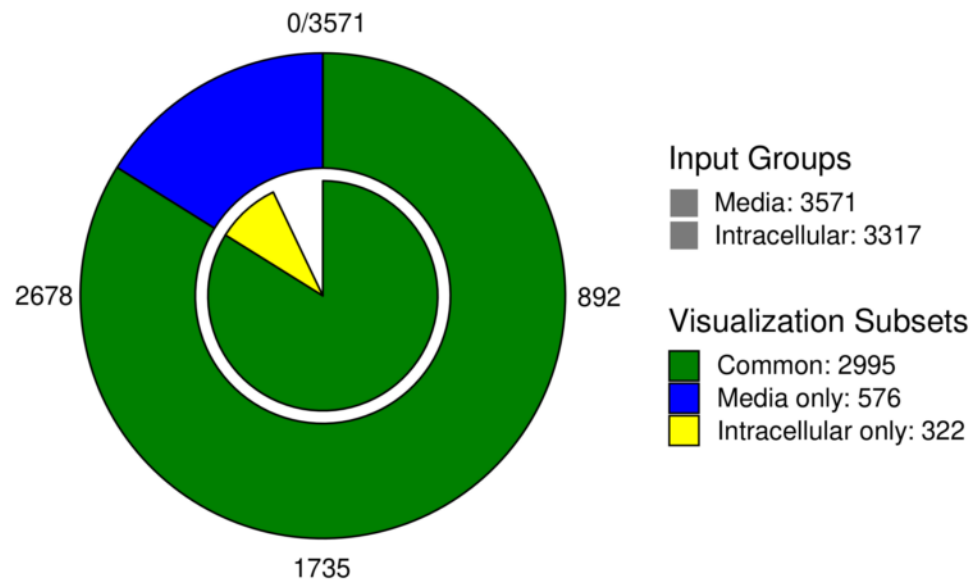**Fig. 1**

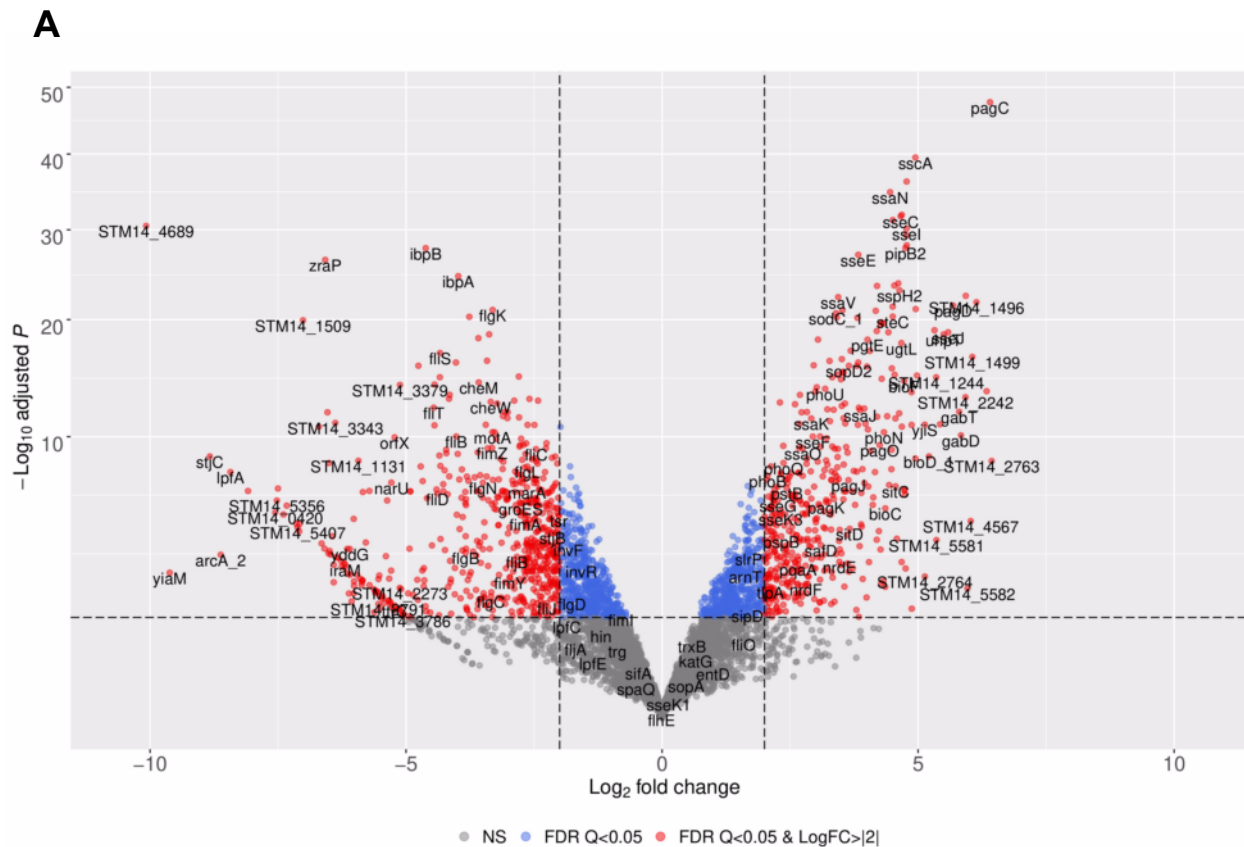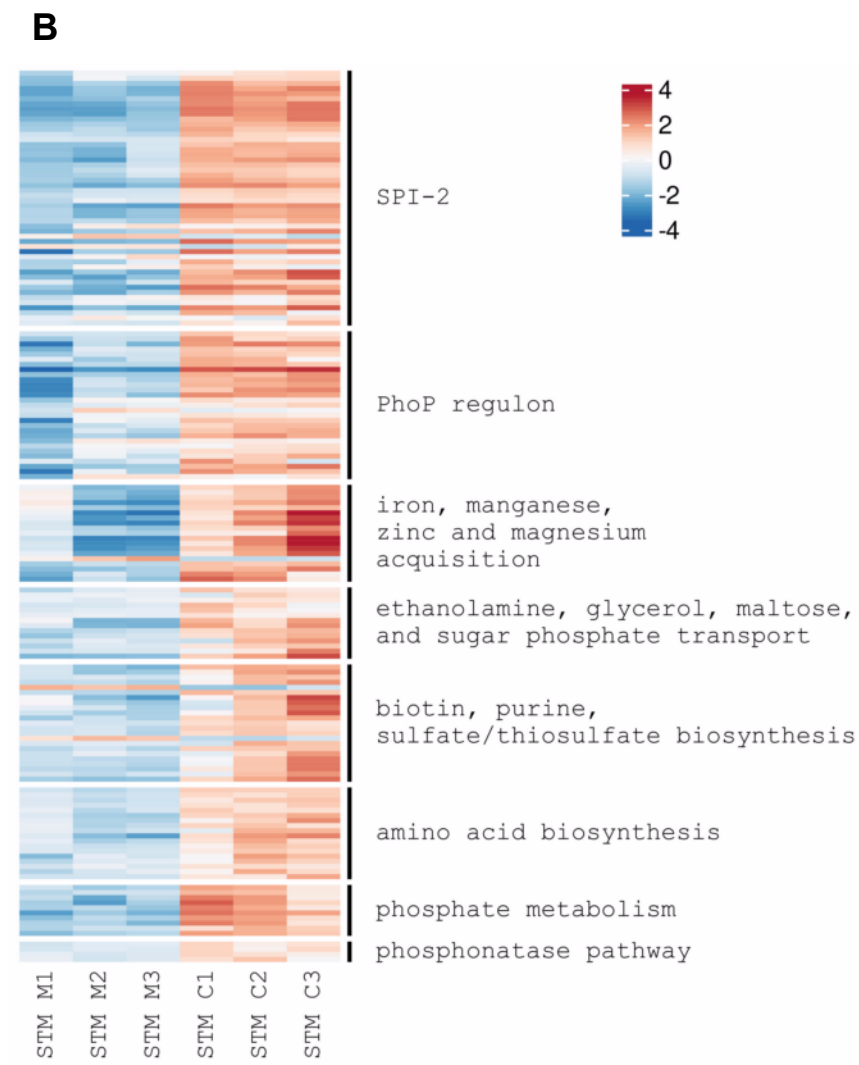

**Fig. 2**

**A**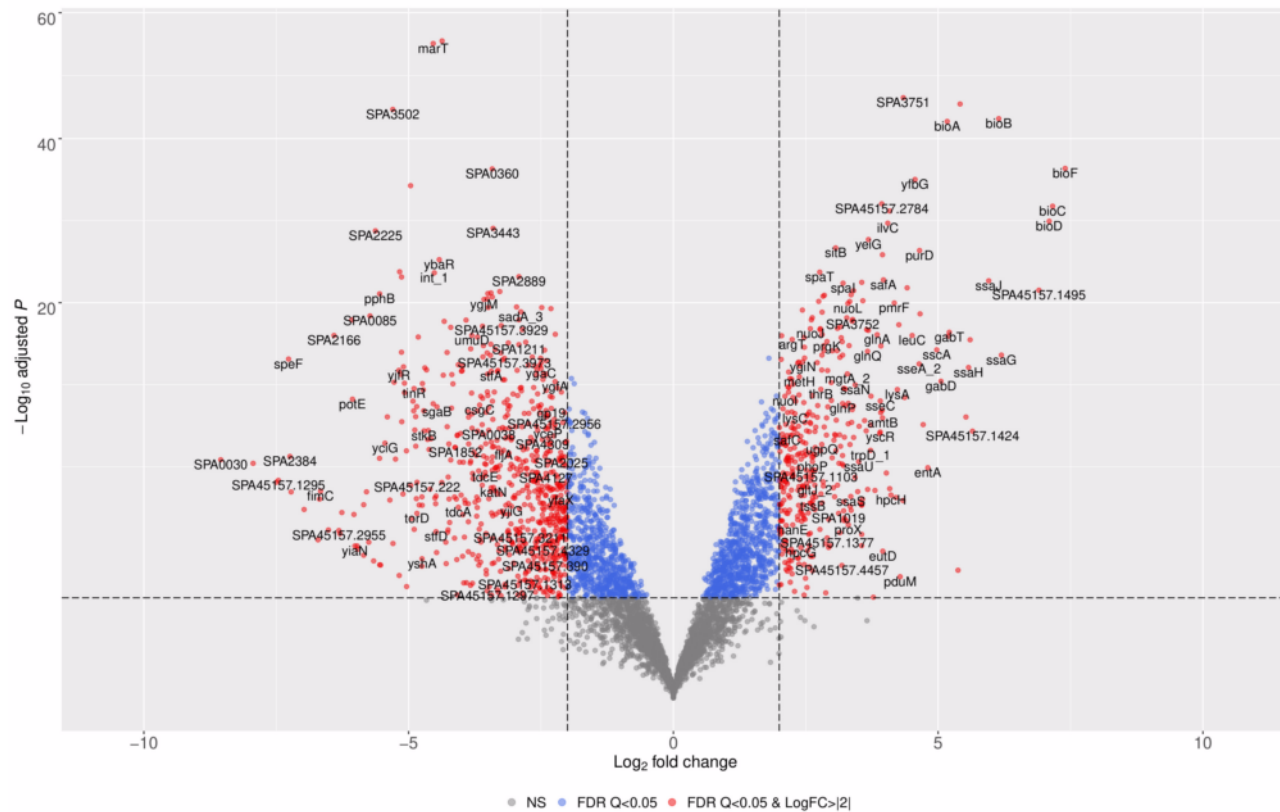**B**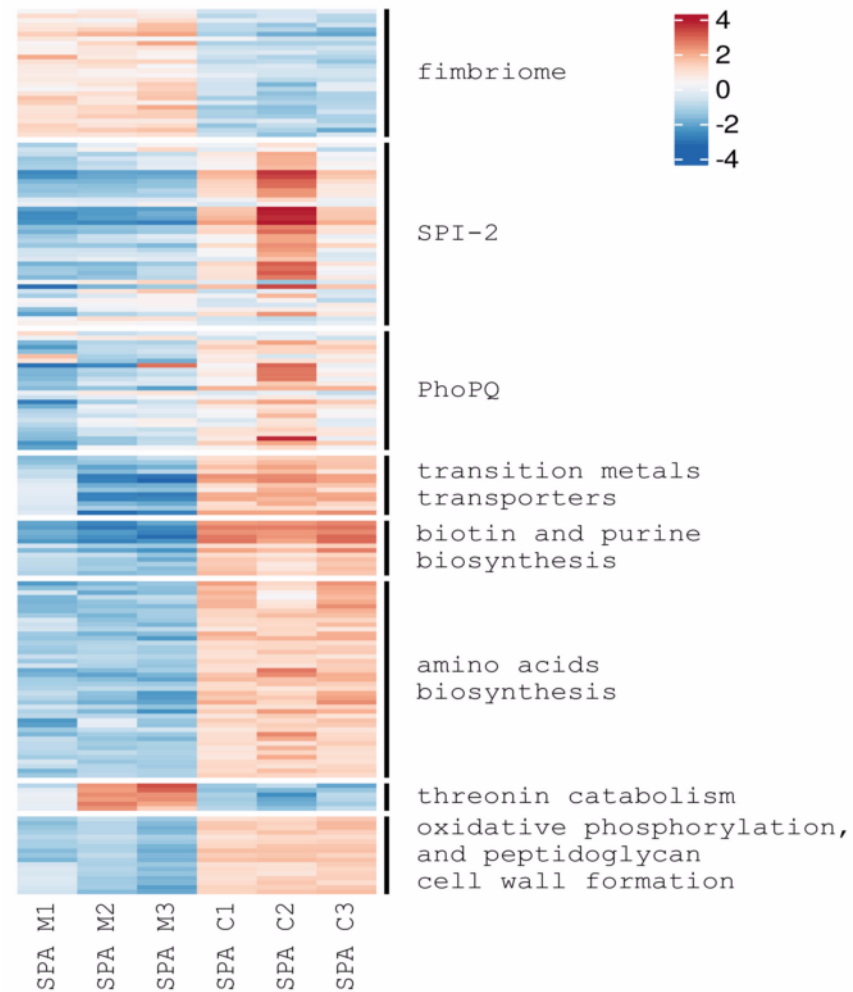**Fig. 3**

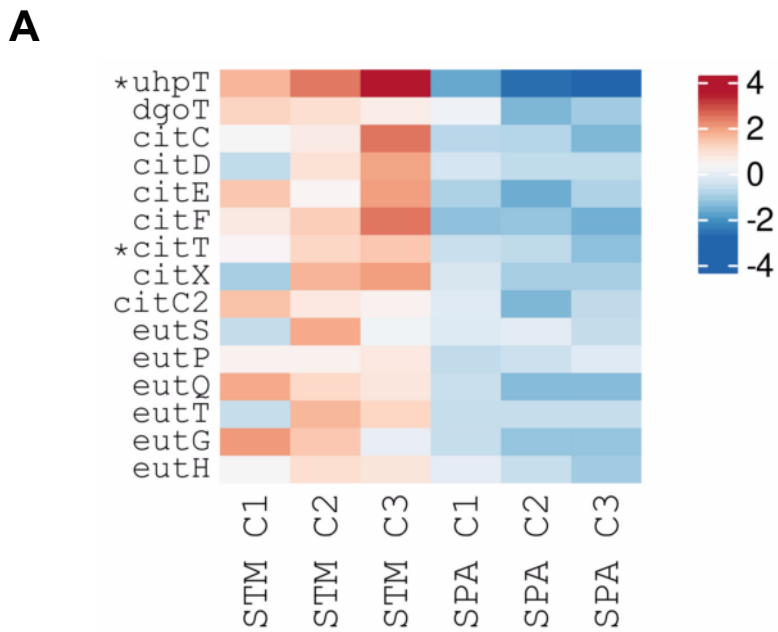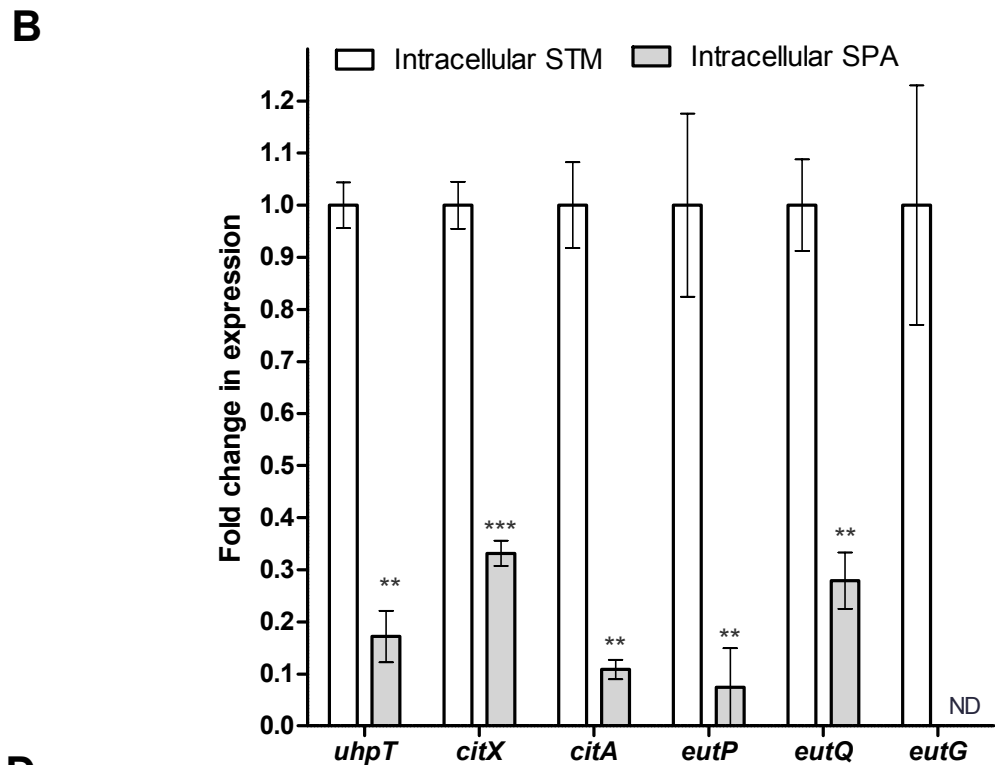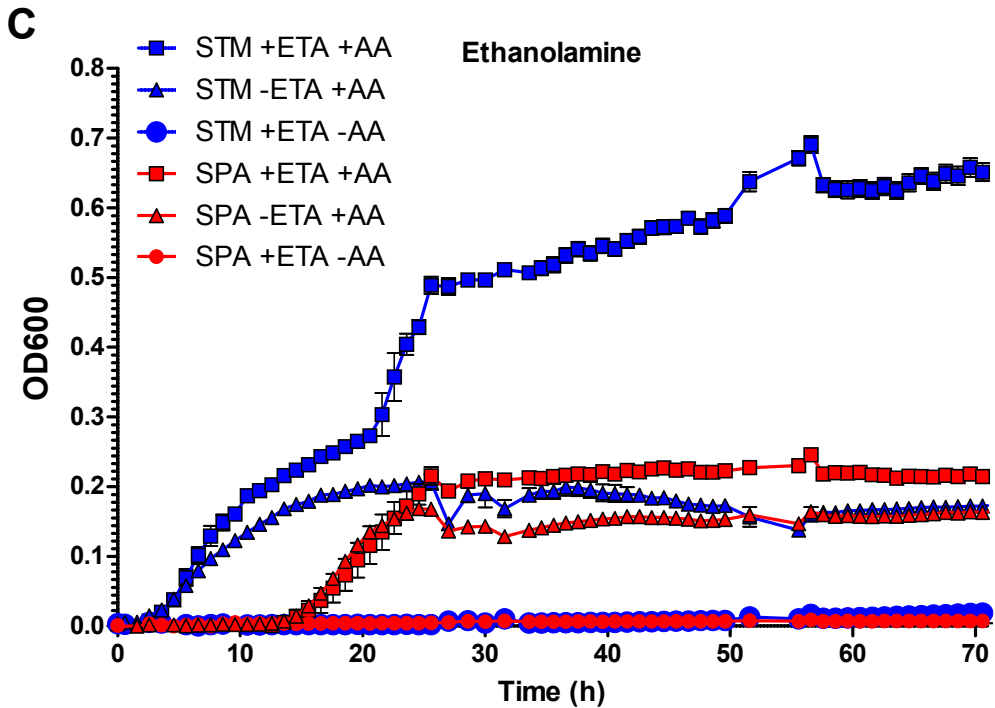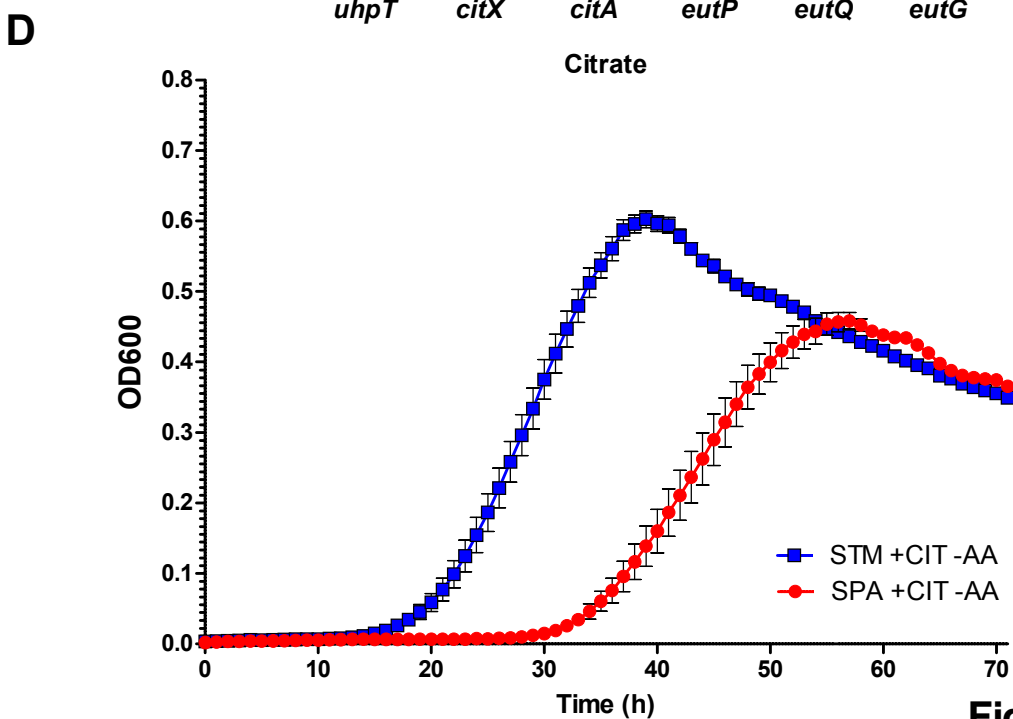

**Fig. 4**

**A**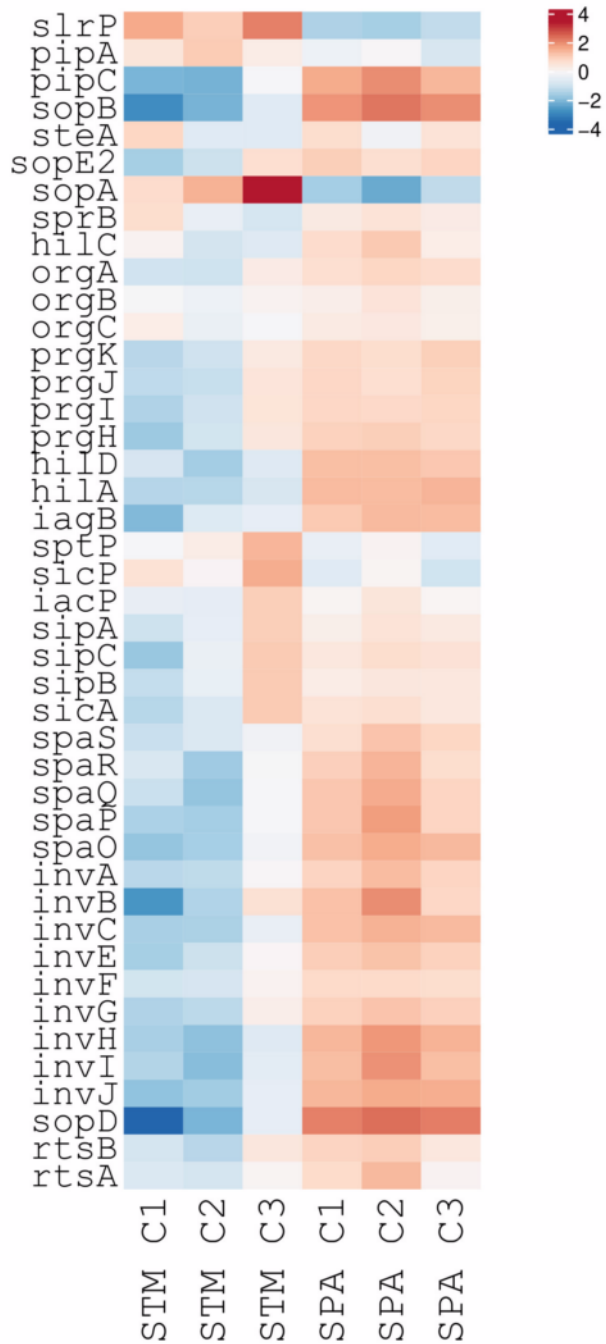**B**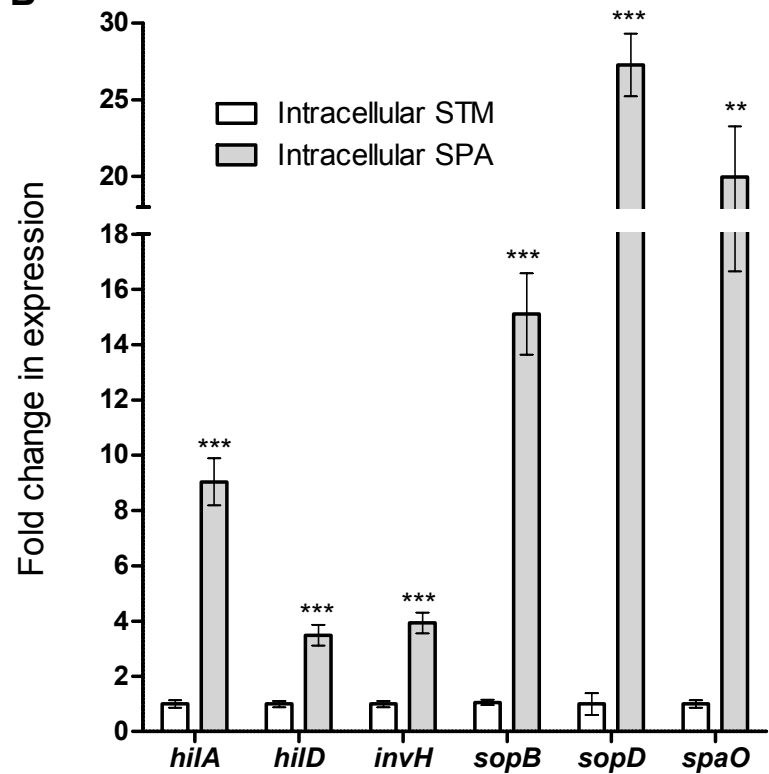**C**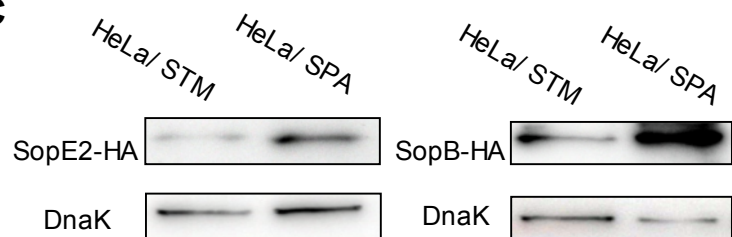**Fig. 5**



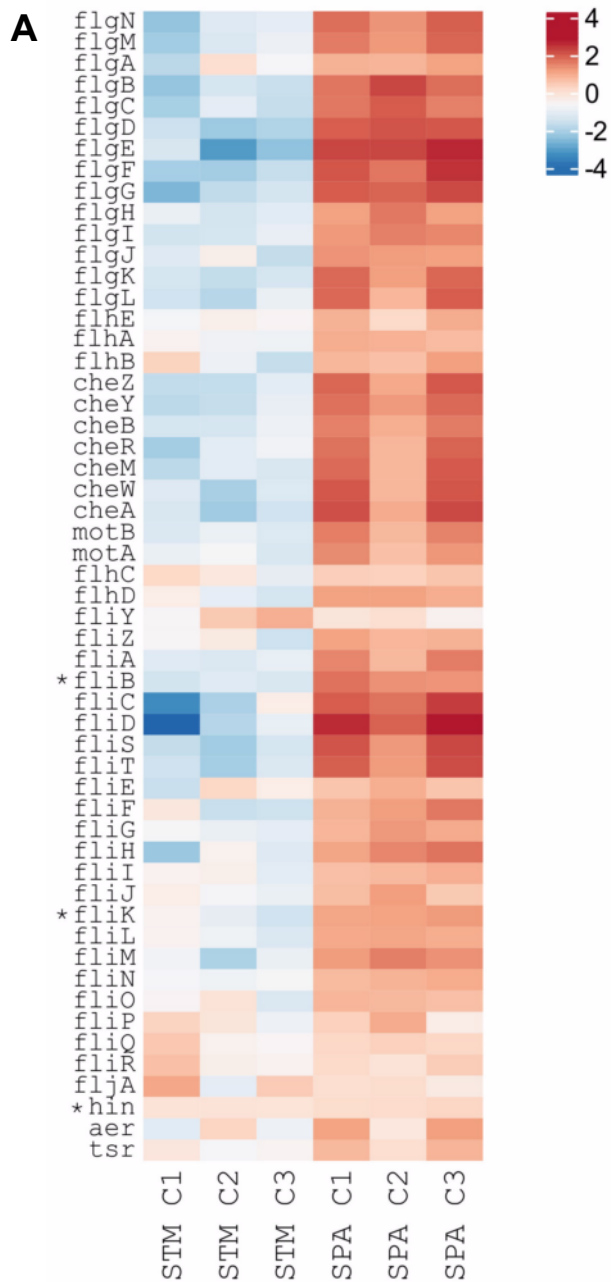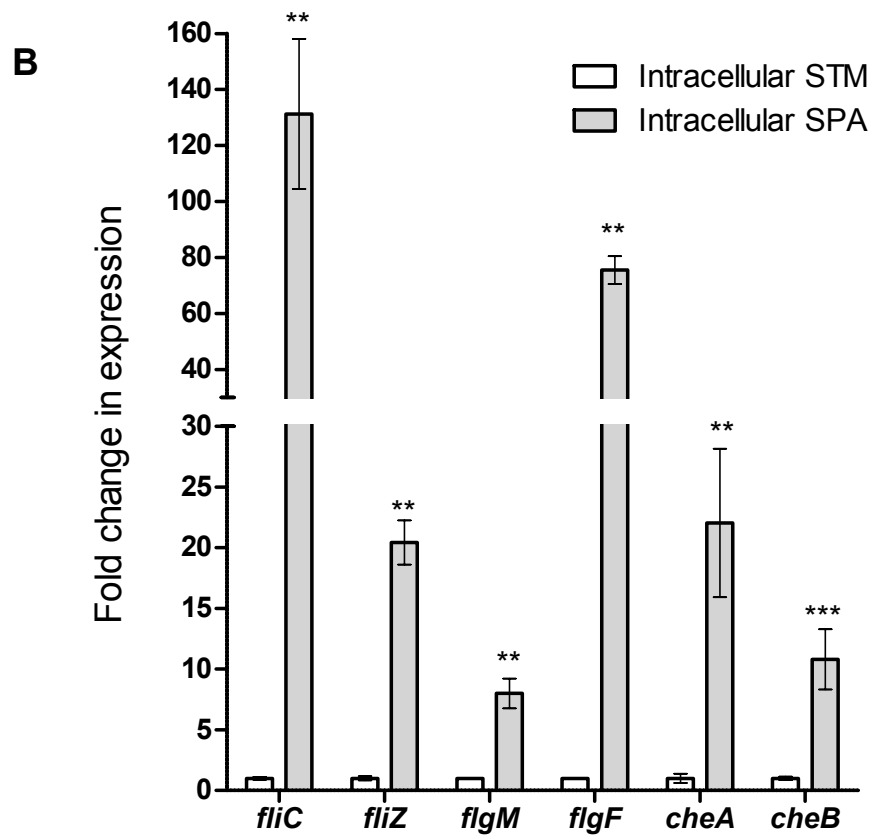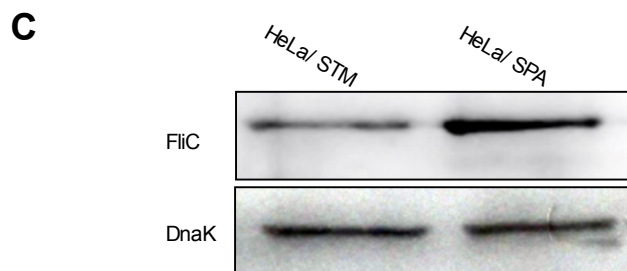

**Fig. 6**

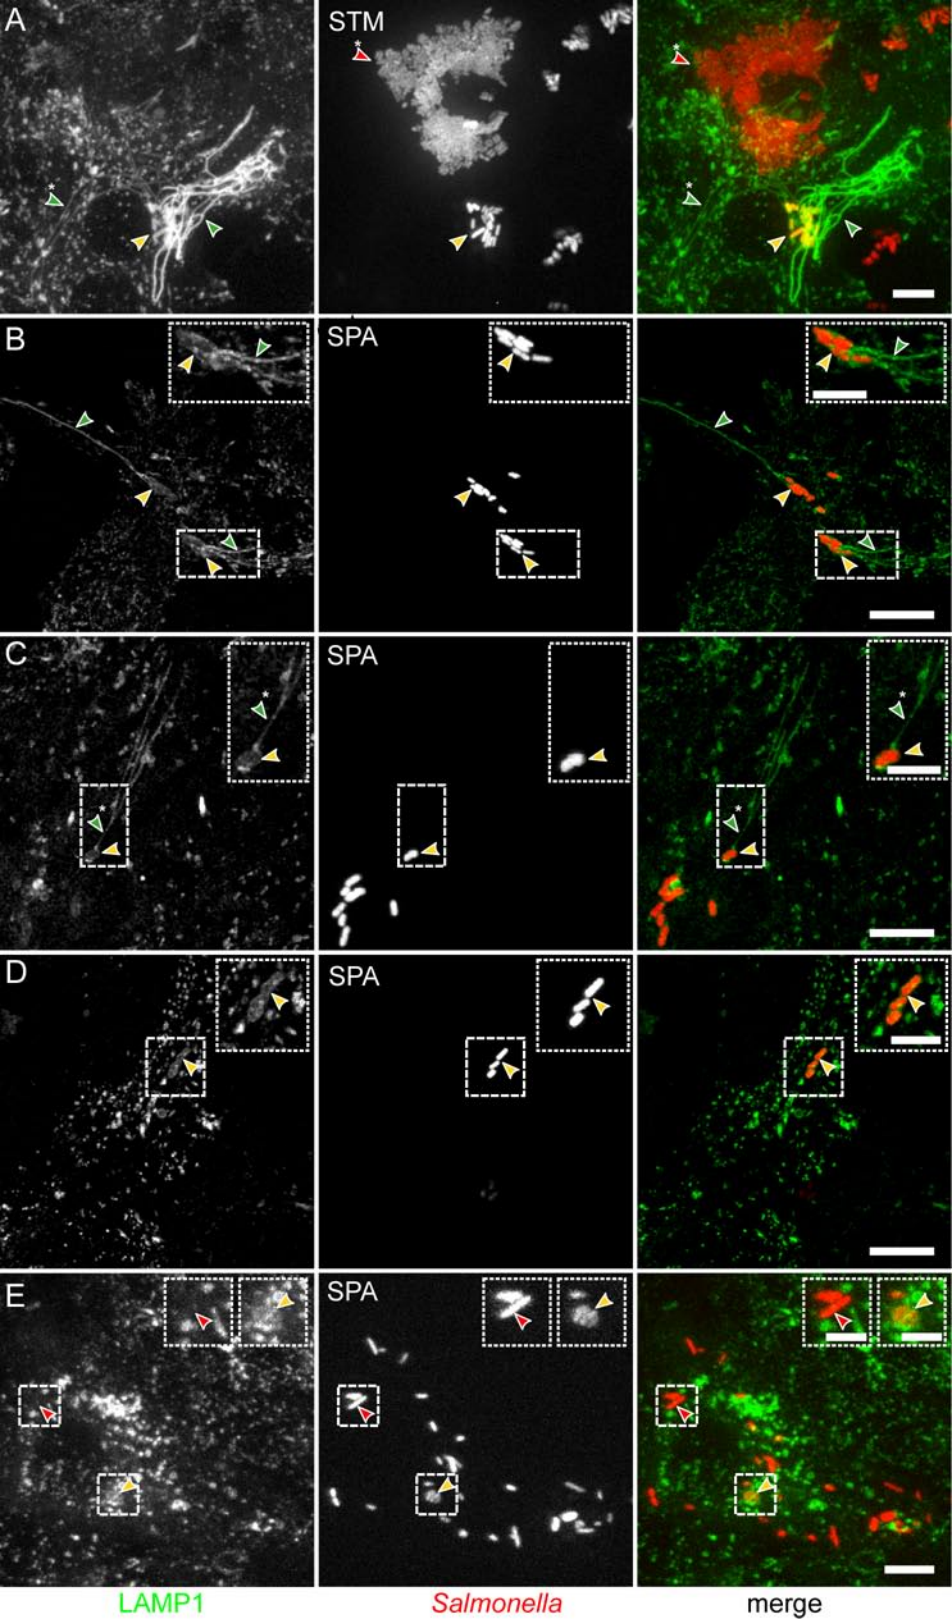

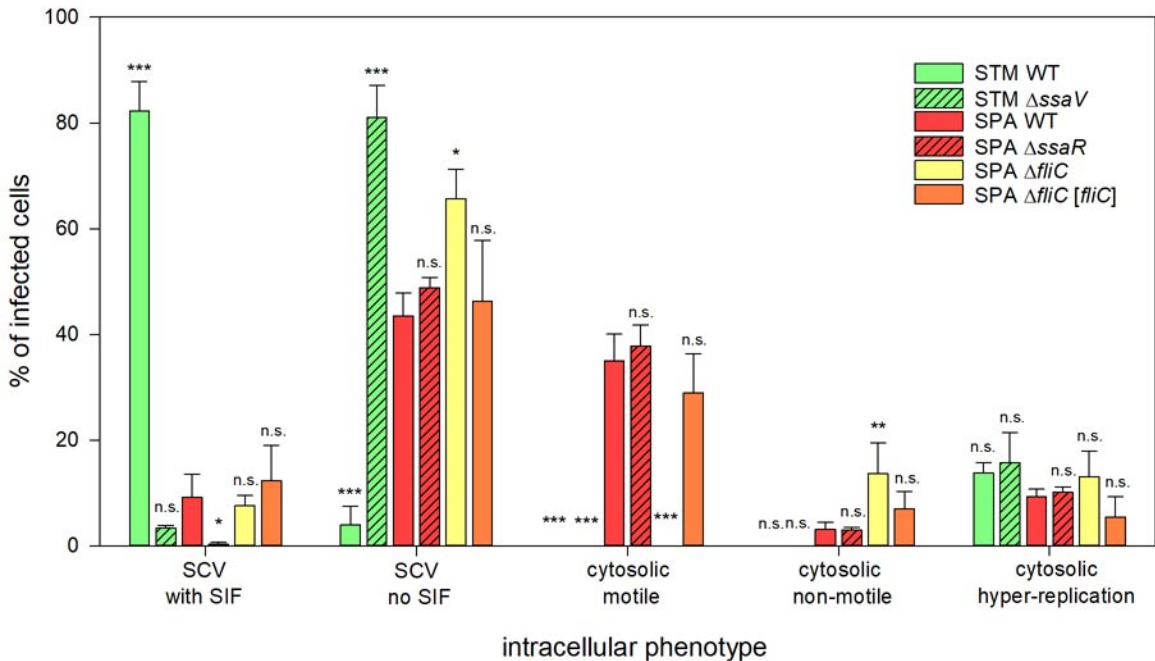

**A**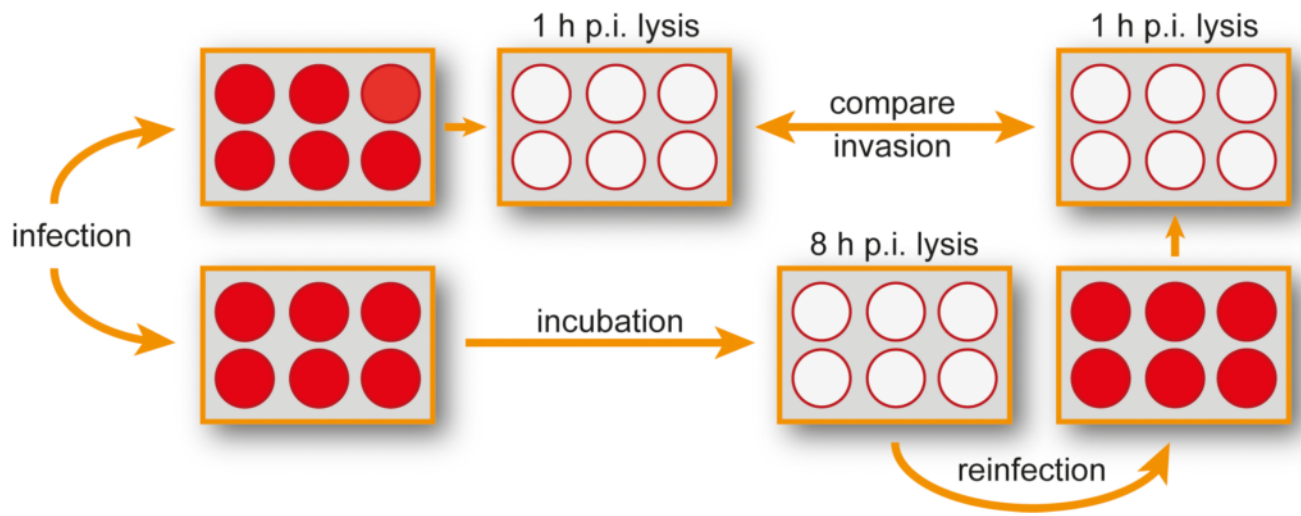**B**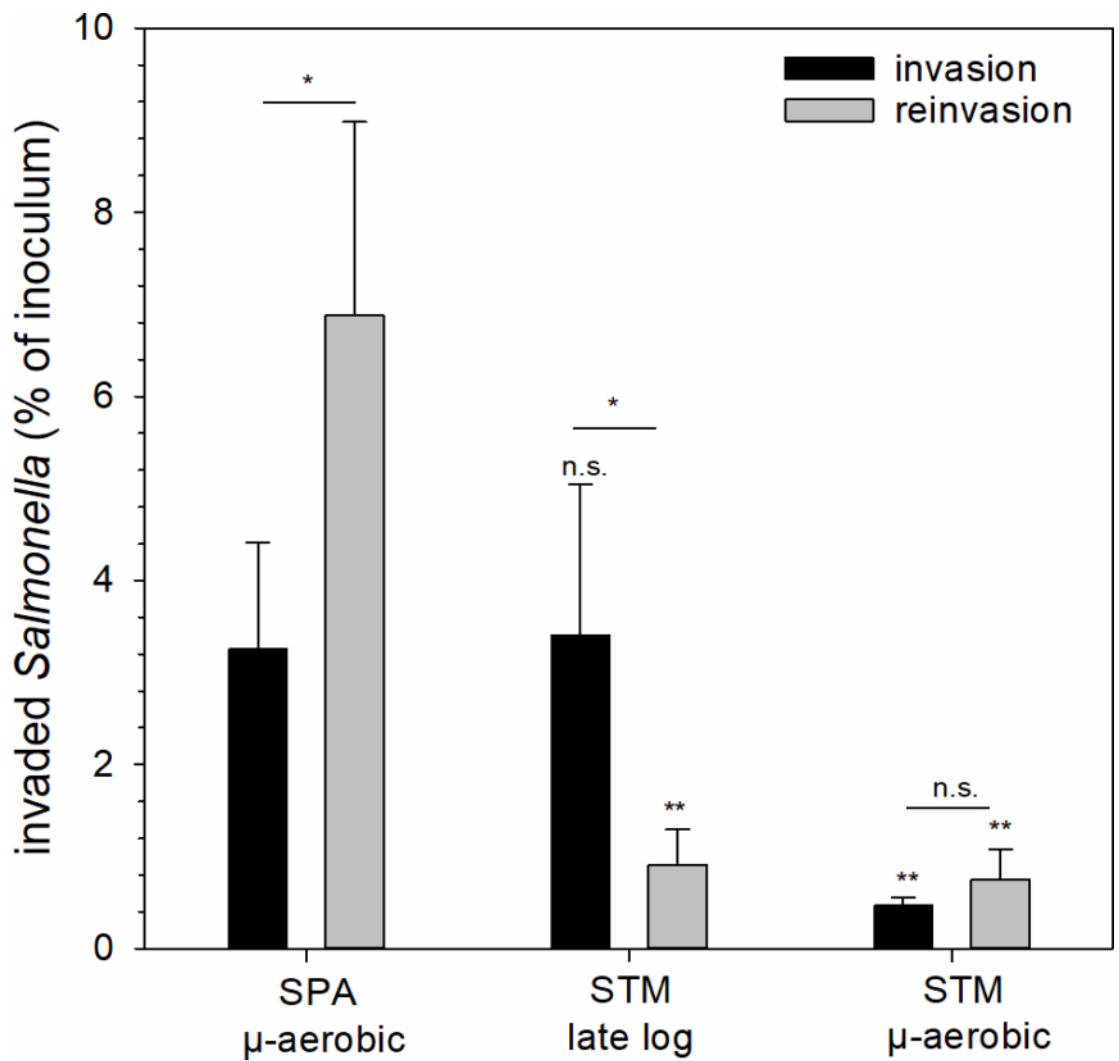

**A**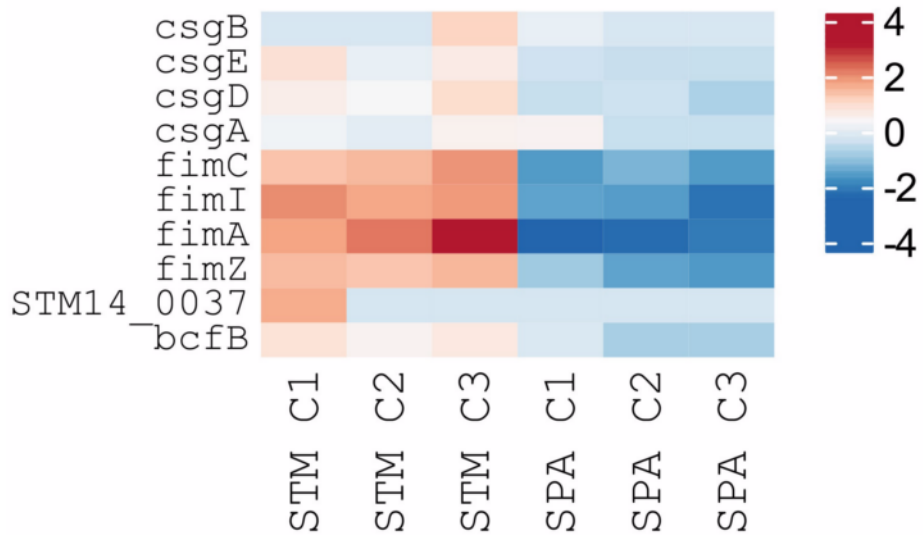**B**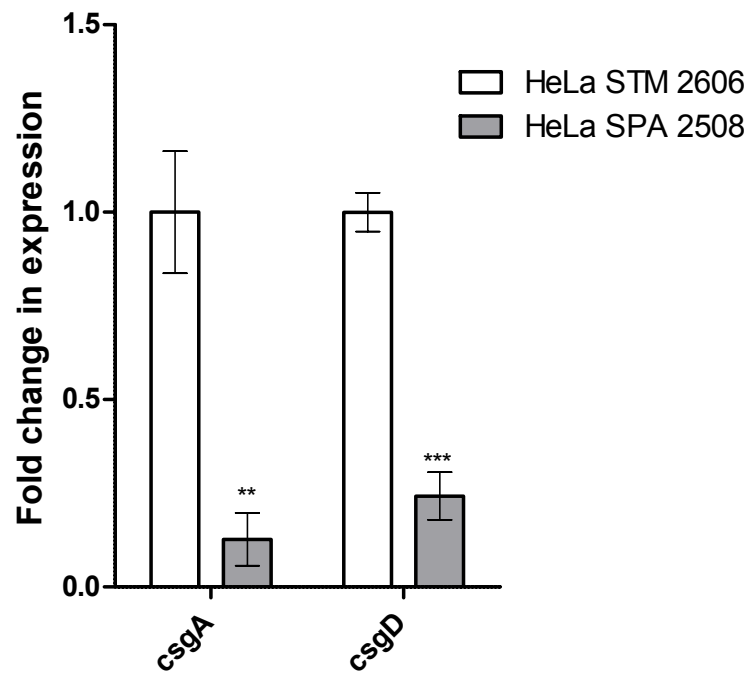

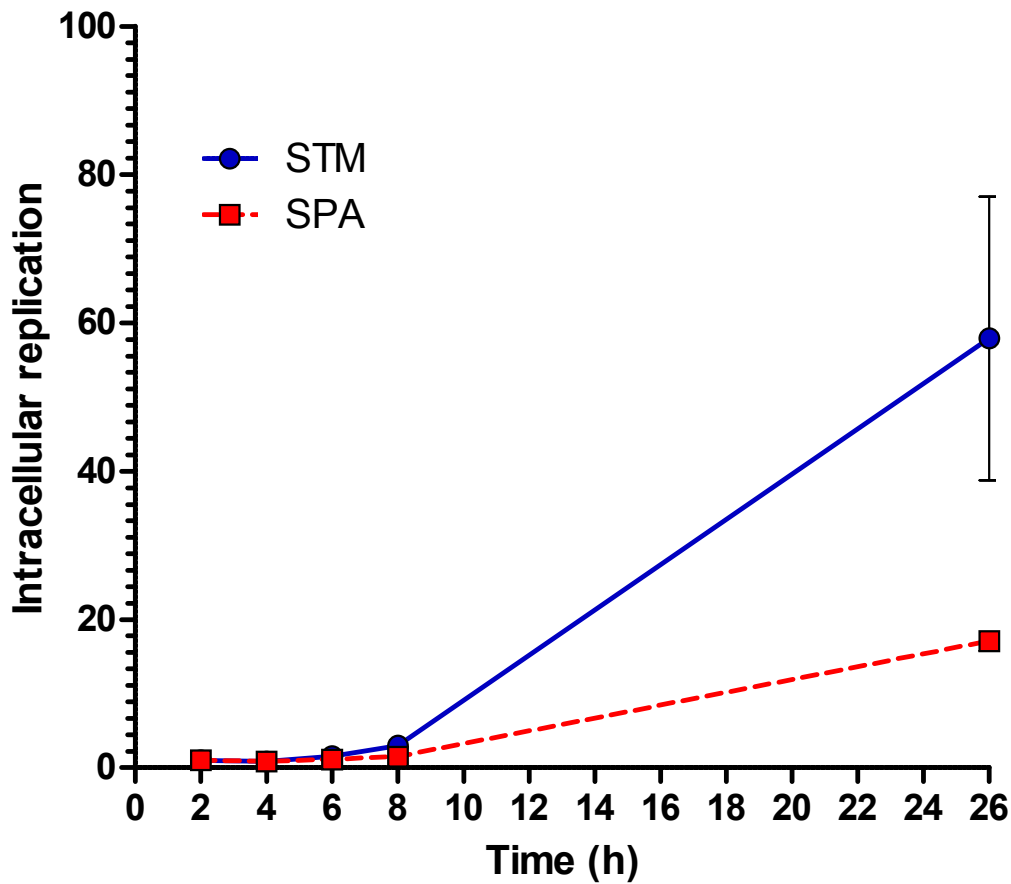

Fig. S2

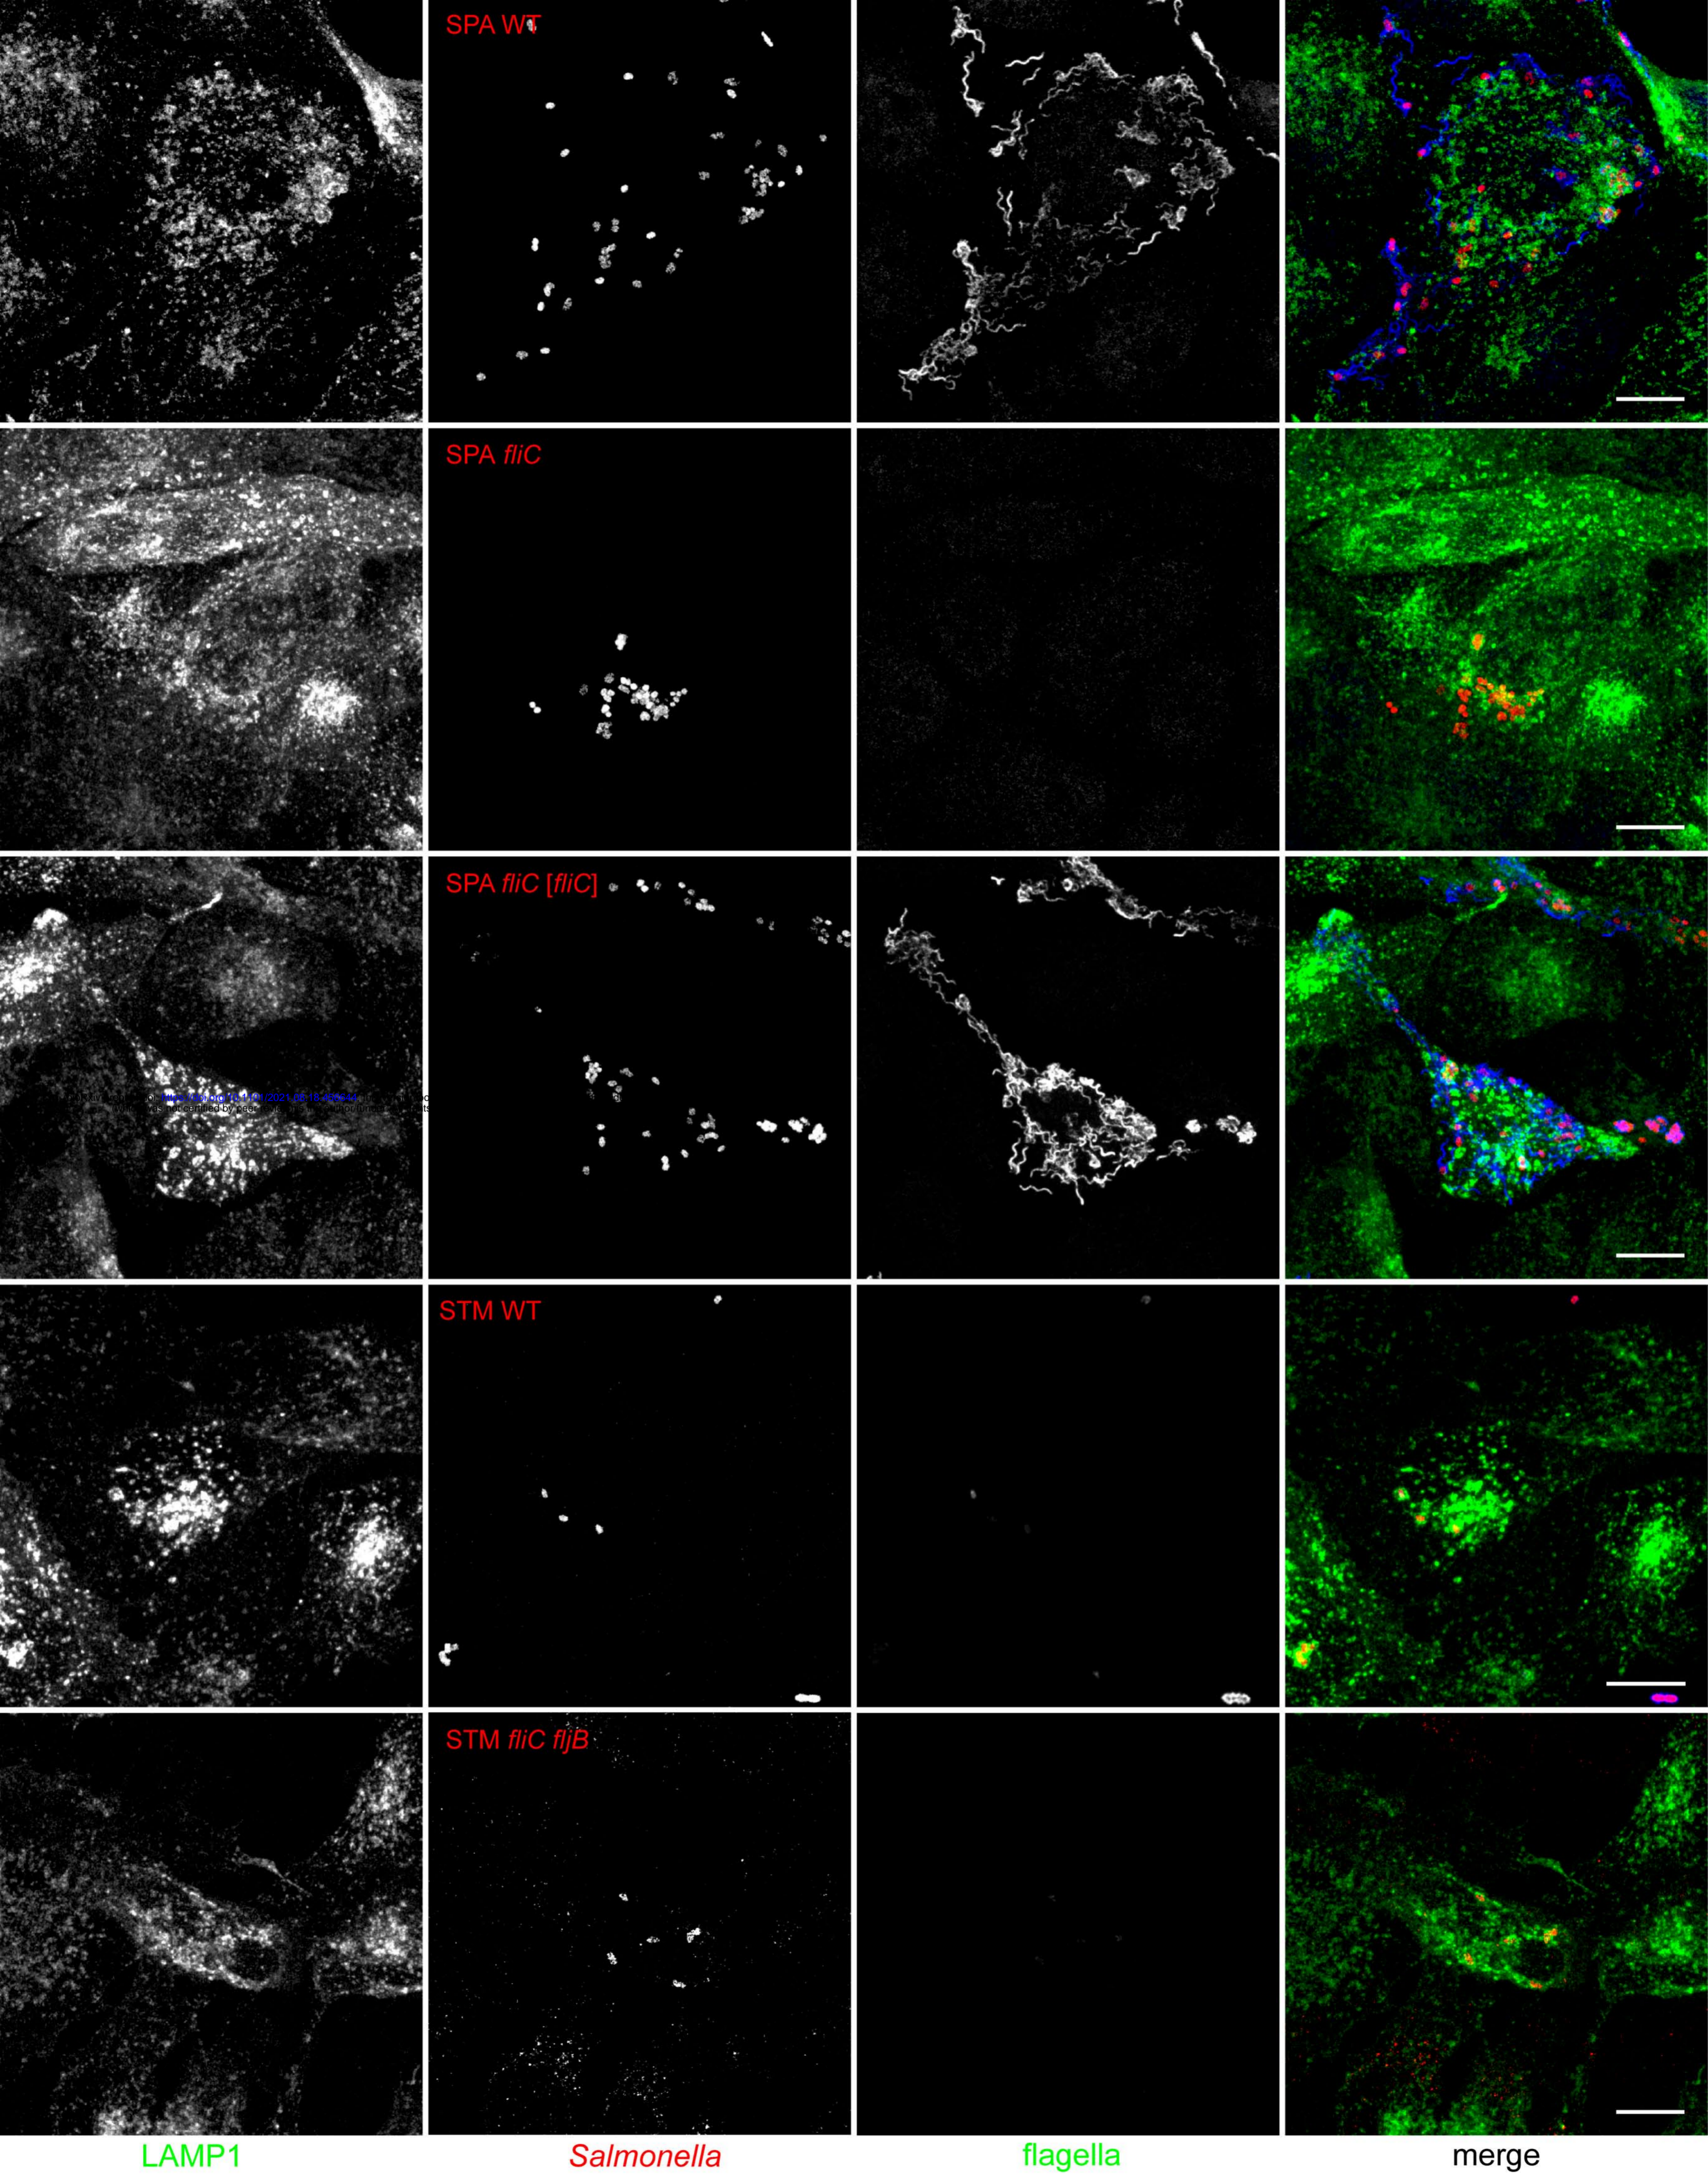

SPA WT

SPA *fliC*

SPA *fliC* [*fliC*]

STM WT

STM *fliC fljB*

LAMP1

Salmonella

flagella

merge

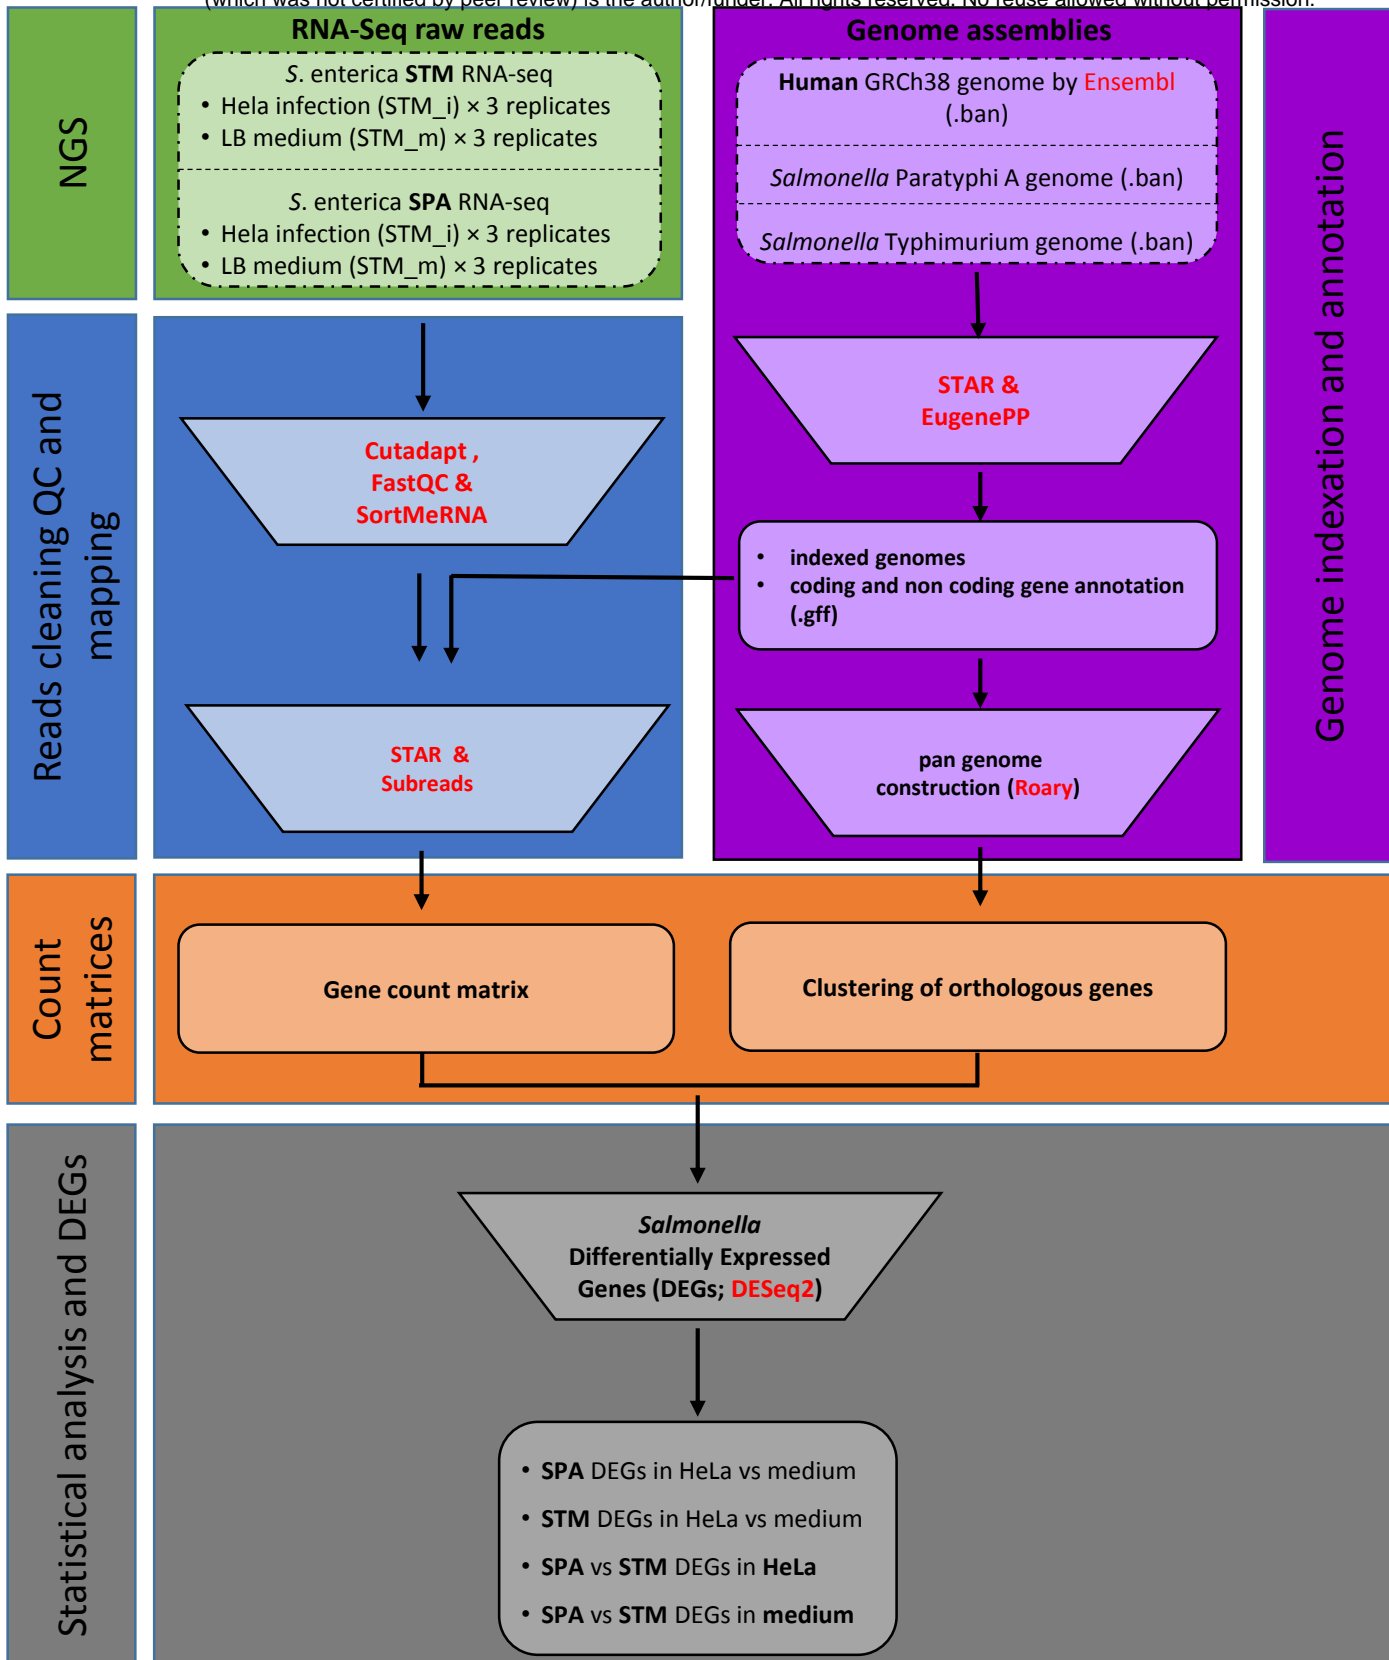

Fig. S4
